1 **Hidden in plain sight - highly abundant and diverse planktonic freshwater *Chloroflexi***

2

3 Maliheh Mehrshad<sup>1\*</sup>, Michaela M. Salcher<sup>2</sup>, Yusuke Okazaki<sup>3</sup>, Shin-ichi Nakano<sup>3</sup>, Karel Šimek<sup>1</sup>,

4 Adrian-Stefan Andrei<sup>1</sup>, Rohit Ghai<sup>1\*</sup>

5

6 <sup>1</sup> Biology Centre of the Czech Academy of Sciences, Institute of Hydrobiology, Department of Aquatic  
7 Microbial Ecology, České Budějovice, Czech Republic

8 <sup>2</sup> Department of Limnology, Institute of Plant Biology, University of Zurich, Seestrasse 187, CH-8802  
9 Kilchberg, Switzerland

10 <sup>3</sup> Center for Ecological Research, Kyoto University, 2-509-3 Hirano, Otsu, Shiga, 520-2113, Japan

11

12 \*Corresponding authors:

13 Maliheh Mehrshad

14 Rohit Ghai

15 Institute of Hydrobiology, Department of Aquatic Microbial Ecology, Biology Centre ASCR

16 Na Sádkách 7, 370 05, České Budějovice, Czech Republic

17 Tel: 00420 38777 5819

18 Email: chaji.ml@gmail.com,

19 ghai.rohit@gmail.com

20

21 **Abstract**

22 **Background:** Representatives of the phylum *Chloroflexi*, though reportedly highly abundant (up to  
23 30% of total prokaryotes) in the extensive deep water habitats of both marine (SAR202) and  
24 freshwater (CL500-11), remain uncultivated and uncharacterized. There are few metagenomic  
25 studies on marine *Chloroflexi* representatives, while the pelagic freshwater *Chloroflexi* community  
26 is largely unknown except for a single metagenome-assembled genome of CL500-11.

27 **Results:** Here we provide the first extensive examination of the community composition of this  
28 cosmopolitan phylum in a range of pelagic habitats (176 datasets) and highlight the impact of  
29 salinity and depth on their phylogenomic composition. Reconstructed genomes (53 in total) provide  
30 a perspective on the phylogeny, metabolism and distribution of three novel classes and two family-  
31 level taxa within the phylum *Chloroflexi*. We unraveled a remarkable genomic diversity of pelagic  
32 freshwater *Chloroflexi* representatives that thrive not only in the hypolimnion as previously  
33 suspected, but also in the epilimnion. Our results suggest that the lake hypolimnion provides a  
34 globally stable habitat reflected in lower species diversity among hypolimnion specific CL500-11  
35 and TK10 clusters in distantly related lakes compared to a higher species diversity of the epilimnion  
36 specific SL56 cluster. Cell volume analyses show that the CL500-11 are amongst the largest  
37 prokaryotic cells in the water column of deep lakes and with a biomass:abundance ratio of two they  
38 significantly contribute to the deep lake carbon flow. Metabolic insights indicate participation of  
39 JG30-KF-CM66 representatives in the global cobalamin production via cobinamide to cobalamin  
40 salvage pathway.

41 **Conclusions:** Extending phylogenomic comparisons to brackish and marine habitats suggests  
42 salinity as the major influencer of the community composition of the deep-dwelling *Chloroflexi* in  
43 marine (SAR202) and freshwater (CL500-11) habitats as both counterparts thrive in intermediate  
44 brackish salinity however, freshwater habitats harbor the most phylogenetically diverse community  
45 of pelagic *Chloroflexi* representatives that reside both in epi- and hypolimnion.

46 **Keywords:** *Chloroflexi*, freshwater ecology, metagenomics, CARD-FISH

## 47 Background

48 In recent years, a combination of improved cultivation techniques and the use of cultivation-free  
49 approaches has led to an increasingly detailed understanding of several groups of abundant and  
50 ubiquitous freshwater microbes e.g. *Actinobacteria* [1–3], *Betaproteobacteria* [3–6],  
51 *Alphaproteobacteria* [3, 7–9] and *Verrucomicrobia* [10]. However, there are still cases of several  
52 ubiquitous groups that have largely eluded extensive characterizations. One such important  
53 instance is the phylum *Chloroflexi*, that has been shown to be abundant (up to 26% of total  
54 prokaryotic community), but mostly in the hypolimnion of lakes. In particular, the CL500-11 lineage  
55 (class *Anaerolineae*) is a significant member in deeper waters. Originally described from Crater  
56 Lake (USA) (>300m depth) using 16S rRNA clone library and oligonucleotide probe hybridization  
57 [11, 12], these microbes have been found to constitute consistently large fractions of prokaryotic  
58 communities (up to 26%) in deep lake hypolimnia all over the world [11–16]. The only genomic  
59 insights into their lifestyle come from a single metagenomic assembled genome (MAG) from Lake  
60 Michigan (estimated completeness 90%) along with *in situ* expression patterns that revealed  
61 CL500-11 to be flagellated, aerobic, photoheterotrophic bacteria, playing a major role in  
62 demineralization of nitrogen-rich dissolved organic matter in the hypolimnion [16]. Another lineage  
63 is the CL500-9 cluster [11], that was described as a freshwater sister lineage of the marine SAR202  
64 cluster (now class 'Ca. Monstramaria') [17] but since the original discovery, there have been no  
65 further reports of its presence in other freshwater environments. Apart from these, there are only  
66 sporadic reports (of 16S rRNA sequences) for pelagic *Chloroflexi*, with little accompanying  
67 ecological information (e.g. SL56, TK10 etc.) [14, 15, 18–20].

68 In this work, we attempt to provide a combined genomic perspective on the diversity and  
69 distribution of *Chloroflexi* from freshwater, brackish and marine habitats. Using publicly available  
70 metagenomic data supplemented with additional sequencing from both epilimnion and  
71 hypolimnion at multiple sites, we describe three novel class-level groups of freshwater *Chloroflexi*,  
72 along with a diverse phylogenetic assortment of genomes dispersed virtually over the entire  
73 phylum. Our results also suggest that origins of pelagic *Chloroflexi* are likely from soil and sediment  
74 habitats and that their phylogenetic diversity at large correlates inversely to salinity, with freshwater

75 habitats harboring the most diverse phylogenetic assemblages in comparison to brackish and  
76 marine habitats.

77

## 78 **Results and discussion**

79 **Abundance and diversity of the phylum *Chloroflexi* in freshwater environments.** Based on 16S rRNA  
80 read abundances from 117 metagenomes from lakes, reservoirs and rivers, representatives of the  
81 phylum *Chloroflexi* comprised up to seven percent of the prokaryotic community in the epilimnion  
82 (Figure 1A, 1B), however, with large fluctuations. Similar to previous observations [11–16], the  
83 CL500-11 lineage dominated hypolimnion samples (reaching at least 16% in all but one sample,  
84 and nearly 27% in one sample from Lake Biwa) (Figure 1C), apart from a lesser-known group  
85 referred to as the TK10 cluster. The majority of TK10 related 16S rRNA sequences in the SILVA  
86 database [21] originate from soil, human skin or unknown metagenomic samples, while only four  
87 (1.5%) are from freshwaters (Supplementary Figure S1A).

88 Surprisingly, the epilimnion samples were dominated by “SL56 marine group” (up to ca. 5% of total  
89 prokaryotic community). SL56 related sequences of SILVA have been recovered from a freshwater  
90 lake [22] and the Global Ocean Series datasets (GOS) [23]. However, the GOS sample from which  
91 they were described is actually a freshwater dataset, Lake Gatun (Panama). It is quite evident from  
92 our results (Figure 1, Supplementary Figure S2) that this cluster is consistently found only in lakes,  
93 reservoirs and rivers but not in the marine habitat, suggesting it has been incorrectly referred to as  
94 a “marine group”. Another group of sequences, referred to as JG30-KF-CM66, described from  
95 diverse environments (uranium mining waste pile, soil, freshwater, marine water column and  
96 sediment) was found to be preferentially distributed in rivers (particularly the River Amazon) than  
97 lakes (Figure 1A and B), albeit at very low abundances (maximum 1% of total prokaryotes). Similar  
98 abundances were found in the brackish Caspian Sea (depths 40m and 150m) (Supplementary  
99 Figure S2).

100 However, we could find no support for the presence of either the SAR202 cluster or its freshwater  
101 sister clade CL500-9 in all freshwater metagenomic datasets examined. In marine and brackish  
102 habitats, SAR202 are almost exclusively found in the dark aphotic layers, where they account for

103 up to 30% of the prokaryotic community [24–26]. If there are any SAR202 related clades in  
104 freshwater habitats they are certainly not very abundant or perhaps did not originate from the water  
105 column in the original report [11] (Supplementary Figure S1). Overall, even though relative  
106 abundances of *Chloroflexi* in the freshwater epilimnia are far lower than in the deeper waters, they  
107 are home to a rich and widespread collection of novel groups.

108 With these observations, it is also readily apparent that in the aquatic environments examined here  
109 (freshwater, brackish and marine), the diversity of *Chloroflexi* representatives is substantially  
110 different, with the freshwater environments harboring a phylogenetically more diverse assortment  
111 of groups than either the brackish or the marine. Moreover, there is clear evidence for the presence  
112 of freshwater only groups (e.g. SL56), and marine and brackish only groups (SAR202), reiterating  
113 that salinity is a barrier towards microbial habitat transitions between freshwater and marine  
114 ecosystems [27]. It is by no means an insurmountable barrier as relatively recent transitions from  
115 freshwater to marine (e.g. the freshwater 'Ca. Methylopusillus spp.' and marine OM43 [28, 29])  
116 and in reverse (marine *Pelagibacter* and freshwater LD12 [30, 31]) have both been proposed.  
117 However, it is likely that the groups found in brackish environments may perhaps be simply better  
118 “primed” for more successful forays. We do find examples of groups that are present in freshwater  
119 and brackish metagenomes (JG30-KF-CM66 and CL-500-11).

120 **The major freshwater *Chloroflexi* representatives.** Automated binning of *Chloroflexi* related contigs  
121 from assemblies of each 57 datasets belonging to 14 different environments (26 lakes/reservoirs,  
122 26 rivers and 3 brackish datasets) resulted in segregation of 102 MAGs (metagenome-assembled  
123 genomes) in total (Supplementary Table S1). Phylogenetic analysis of MAGs with 30% or higher  
124 completeness (n=53) shows that a remarkably high diversity of MAGs was recovered from  
125 practically all well-known *Chloroflexi* classes (Figure 2). 35 MAGs constituted three separate novel  
126 class level lineages with no available cultured representatives (SL56, TK10 and JG30-KF-CM66).  
127 While CARD-FISH detected high numbers of the CL-500-11 cells in Lake Zurich epilimnion during  
128 partial mixis in winter, peak abundance levels were always found in deeper zones, in both Lake  
129 Zurich (up to 11% of all prokaryotes; Figure 3A) and Lake Biwa (up to 14%; Figure 3D). CL500-11  
130 abundance correlated negatively with both temperature and chlorophyll a concentration

131 (Supplementary Figure S3). In the Řimov reservoir samples however, CL-500-11 was below the  
132 detection limit (<0.18%), suggesting that this relatively shallow habitat (maximum depth 43m) does  
133 not represent a preferred niche for this group of bacteria (Supplementary Figure S4). CL-500-11  
134 cells have been previously visualized by CARD-FISH and shown to be large, curved cells [13]. Similar  
135 shapes and sizes were observed in FISH samples from Lake Zurich with mean lengths of 0.92  $\mu\text{m}$   
136 (range 0.4-1.6  $\mu\text{m}$ ; n=277) and widths of 0.28  $\mu\text{m}$  (range 0.19-0.39  $\mu\text{m}$ ). Analyzing the cell volumes  
137 (0.06  $\mu\text{m}^3$  median) and biomass for this cluster in comparison to all prokaryotes (Figure 3C)  
138 suggests an extremely high contribution of the CL-500-11 population to total microbial biomass.  
139 Their biomass:abundance ratio is nearly 2, i.e. at 10% abundance they comprise almost 20% of the  
140 total prokaryotic biomass, indicating a remarkable adaptation to the relatively oligotrophic deep  
141 hypolimnion, attaining high populations even with their large cell sizes.

142 We recovered 11 MAGs (10 freshwaters, 1 brackish) for CL500-11 in total. All four MAGs of Lake  
143 Biwa from different months form a single species. However, the two species from Lake Zurich  
144 appear to coexist throughout the year (March, May and November) with one species branching  
145 together with the previously described MAG from Lake Michigan (CL500-11-LM) [16], and the other  
146 species having close representatives also in the brackish Caspian (>95% ANI) and similar  
147 metagenomic fragment recruitment patterns (Figure 2 and 4C). We propose the candidate genus  
148 *Profundisolitarius* (Pro.fun.di.so.li.ta'ri.us. L. adj. profundus deep; L. adj. solitarius alone; N.L. masc.  
149 n. *Profundisolitarius* a sole recluse from the deep) within *Candidatus Profundisolitariaceae* fam.  
150 nov. for the CL500-11 cluster (class *Anaerolinea*).

151 On the other hand, the SL56 group is the dominant lineage in the Řimov reservoir (maximum 1.1%),  
152 both by 16S rRNA and CARD-FISH analyses (Figure 1 and Figure 3). Maximal abundances were  
153 nearly always found at around 5-20m at temperatures of ca. 15°C, suggesting that this group is  
154 primarily epilimnetic (Supplementary Figures S3 and S4). This region of the water column  
155 (thermocline), apart from having a temperature gradient, also has significantly lower light intensity  
156 in comparison to surface layers. Peak abundances of the low light adapted cyanobacterium  
157 *Planktothrix rubescens* [32] at around 13m depth in the stratified summer profiles of Lake Zurich,  
158 coincide with maximal abundances of the SL56 (Supplementary Figure S3). SL56 cells are rod-

159 shaped and elongated (average length= $0.68 \pm 0.25 \mu\text{m}$ ; average width= $0.35 \pm 0.09 \mu\text{m}$ ; n=6;  
160 Figure 3E). To the best of our knowledge, this is the first report of a freshwater specific *Chloroflexi*  
161 group that appears to thrive in the epilimnion.

162 A total of 14 MAGs were recovered for SL56 cluster (1 containing 16S rRNA) and form a class level  
163 lineage, considerably divergent from all known *Chloroflexi* (Figure 2). Their sole relative is a single  
164 MAG (*Chloroflexi* CSP1-4) described from aquifer sediment [33]. The 16S rRNA clade to which the  
165 CSP1-4 reportedly affiliates to is Gitt-GS-136 [33] and the majority of sequences in this clade  
166 originate from either soil or river sediments (information from SILVA taxonomy). However, we were  
167 unable to detect any 16S rRNA sequence (partial or complete) in the available genome sequence  
168 of CSP1-4. The next closest clade (in the 16S rRNA taxonomy) to Gitt-GS-136 and SL56 is KD4-96,  
169 whose sequences were obtained from the same habitats (See Supplementary Figure S1B). In  
170 addition, all known 16S rRNA sequences from the SL56 group originate only from freshwaters (Lake  
171 Gatun, Lake Zurich etc.). Taken together, it appears that the closest phylogenetic relatives of the  
172 freshwater SL56 lineage inhabit soil or sediment habitats.

173 SL56 MAGs were reconstructed from geographically distant locations (Europe, North and South  
174 America, Figure 2) and at least nine different species could be detected (ANI, Figure 1). No MAGs  
175 were obtained from Lake Biwa samples but three 16S rRNA sequence were retrieved in unbinned  
176 contigs. The reconstructed MAGs are globally distributed along the freshwater datasets from the  
177 epilimnion (none detected in the deep hypolimnion) (Figure 4 and Supplementary Figure S6). No  
178 SL56 MAGs were reconstructed from the Caspian Sea and none of the recovered genomes  
179 recruited from brackish metagenomes. We propose the candidate genus *Limnocylin'drus*  
180 (*Lim.no.cy.lin'drus*. Gr. fem. n. *limne* a lake; L. masc. n. *cylindrus* a cylinder; N.L. masc. n.  
181 *Limnocylin'drus* a cylinder from a lake) within *Limnocylin'draceae* fam. nov., *Limnocylin'drales* ord.  
182 nov., and *Limnocylin'dria* classis. nov. for the *Chloroflexi* SL56 cluster.

183 TK10 16S rRNA sequences were found at highest abundances in Lake Biwa hypolimnion samples  
184 (maximum ca. 2%) (Figure 1A and C). Cells were ovoid with an estimated length of  $1.08 \pm 0.1 \mu\text{m}$   
185 and width of  $0.84 \pm 0.09 \mu\text{m}$  (n=12; Figure 3E). A coherent cluster of nine MAGs (3 containing 16S  
186 rRNA Supplementary Figure S1) from geographically distant locations (Europe, Asia and North



187 America) was recovered. These remarkably cosmopolitan organisms thriving in deeper lake strata  
188 are not very diverse (ANI values >95%). This apparent low diversity might be a consequence of a  
189 very specialized niche or what is more likely, an outcome of a relatively recent transition to  
190 freshwater, similar to 'Ca. Fonsibacter' (LD12 *Alphaproteobacteria*) [8]. No 16S rRNA  
191 representatives were detected confidently in marine or brackish metagenomes though some 16S  
192 rRNA sequences of SILVA database have been obtained from marine sediments and water column  
193 (Supplementary Figure S1). Closest relatives from 16S rRNA appear to be either from soil or  
194 sediment samples suggesting that these might be their original habitat. Interestingly, the TK10  
195 cluster is also deep branching, only after SL56 and CSP1-4 in the phylogenetic tree of *Chloroflexi*  
196 at large, and all other *Chloroflexi* representatives (MAGs or isolate genomes) appear to be  
197 descended from a branch distinct to both of these. We suggest the candidate genus *Umbricyclops*  
198 (Um.bri.cy'clops. L. fem. N. umbra shadow; L. masc. n. cyclops (from Gr. Round eye; Cyclops) a  
199 cyclops; N.L. masc. n. Umbricyclops a round-eye living in the shade) within Umbricyclopaceae fam.  
200 Nov., Umbricyclopales ord. nov., and Umbricyclopia classis. nov. for this group of organisms.

201 CARD-FISH results show that JG30-KF-CM66 cells are spherical with an estimated diameter of 0.56  
202  $\mu\text{m}$  ( $\pm 0.15 \mu\text{m}$ ;  $n=8$ ; Figure 3E) however, very low proportions (<0.28%) were observed for JG30-  
203 KF-CM66 in Lake Zurich and the Řimov Reservoir depth profiles (Supplementary Figures S3 and  
204 S4). We obtained 12 MAGs, mostly from deep water column (8 brackish, 4 freshwater), one with a  
205 near complete 16S sequence, that formed a novel class level lineage in the phylogenomic analysis  
206 (Figure 1). The closest relatives of these MAGs are marine SAR202 and *Dehalococcoidea* (Figure 1  
207 and Supplementary Figure S1). Within this cluster distinct groups of brackish and freshwater MAGs  
208 can be distinguished. We suggest the candidate genus *Bathosphaera* (Ba.tho.sphae'ra. Gr. adj.  
209 bathos deep; L. fem. n. sphaera a sphere; N.L. fem. n. Bathosphaera a coccoid bacteria living in  
210 the deep) within Bathosphaeraceae fam. nov., Bathosphaerales ord. nov., and Bathosphaeria  
211 classis. nov. for the *Chloroflexi* JG30-KF-CM66 cluster.

212 We also recovered MAGs in the classes *Chloroflexia* (4 MAGs) and *Caldilineae* (2 MAGs) (Figure 1).  
213 *Chloroflexia* MAGs were related to mesophilic *Oscillochloris trichoides* DG-6 in sub-order  
214 *Chloroflexineae* (1 MAG) and 3 other MAGs to *Kouleothrix aurantiaca* in the *Kouleotrichaceae* fam.



215 nov. forming a new sub-order for which we propose the name *Kouleothrichniae* sub-order. nov.  
216 None of these MAGs show any significant fragment recruitment apart from their place of origin. An  
217 additional 14 MAGs from the Caspian affiliated to the SAR202 cluster which will not be further  
218 discussed here as they have already been described [26].

219 **Contribution of freshwater *Chloroflexi* in ecosystem functioning.** Metabolic insights into the  
220 reconstructed *Chloroflexi* MAGs (completeness  $\geq 30\%$ ) suggest a primarily heterotrophic life style  
221 which in some groups is boosted by light driven energy generation either via rhodopsins (CL500-  
222 11, *Chloroflexales*, SL56, and TK10) or aerobic anoxygenic phototrophy (*Chloroflexales*). The MAGs  
223 of each cluster contain necessary genes for central carbohydrate metabolism including glycolysis,  
224 gluconeogenesis, and tricarboxylic acid cycle. Key genes for assimilatory sulfate reduction (3'-  
225 phosphoadenosine 5'-phosphosulfate (PAPS) synthase and sulfate adenylyltransferase) were  
226 absent in most MAGs suggesting the utilization of exogenous reduced sulfur compounds [34].  
227 Denitrification genes (nitrate reductase/nitrite oxidoreductase alpha and beta subunits and nitrite  
228 reductase) were found in TK10 MAGs but the subsequent enzymes responsible for the production  
229 of molecular nitrogen were absent.

230 In aquatic environments *Thaumarchaeota* and *Cyanobacteria* are the main source of cobalamin  
231 and its corrinoid precursors for the large community of auxotrophs or those few capable of salvage  
232 [35, 36]. De-novo synthesis of cobalamin has a high metabolic cost, and the Black Queen  
233 Hypothesis has been put forward as an explanation for reasons why only a few community members  
234 undertake its production [35, 37, 38]. None of the reconstructed *Chloroflexi* MAGs encode  
235 necessary genes for corrin ring biosynthesis from scratch and high affinity cobalamin (BtuBFCD) or  
236 other suspected corrinoid (DET1174-DET1176) [39] transporters were also missing which may be  
237 a consequence of genome incompleteness or use of an undescribed transporter. However, not all  
238 these organisms seem to be auxotrophs as the MAGs of JG30-KF-CM66 cluster encode genes for  
239 cobinamide to cobalamin salvage pathway that utilizes imported corrinoids together with  
240 intermediates from the riboflavin biosynthesis pathway to synthesize cobalamin [40]. ZH-chloro-G3  
241 MAG contains an almost complete cobalamin salvage (only missing CobC) and riboflavin  
242 biosynthesis pathway (Supplementary Table S2).

243 Flagellar assembly genes were present in several MAGs of CL500-11 and TK10 clusters (Figure 1  
244 and Supplementary Table S2). However, the L and P-ring components that anchor flagella to the  
245 outer membrane were missing in all flagellated MAGs and reference *Chloroflexi* genomes (e.g.  
246 *Thermomicrobium* [41], *Sphaerobacter* [42]). In addition, MAGs and reference *Chloroflexi* genomes  
247 did not encode genes for LPS biosynthesis and no secretion systems, apart from Sec and Tat were  
248 detected (Type I – IV secretion systems that are anchored in the outer membrane are absent)  
249 (Supplementary Table S2). Taken together the comparative genomics of available *Chloroflexi*  
250 genomes bolster inferences that while electron micrographs suggest two electron dense layers in  
251 most members of this phylum, *Chloroflexi* likely possess a single lipid membrane (monoderm)  
252 rather than two (diderms) [42].

253 Rhodopsin-like sequences were recognized in 18 MAGs of this study from representatives of  
254 CL500-11, *Chloroflexia*, SL56, and TK10 that are phylogenetically closest to xanthorhodopsins  
255 (Supplementary Figure S8A and B), and are tuned to absorb green-light similar to other freshwater  
256 and coastal rhodopsins [2, 23] (Supplementary Figure S8C). Several MAGs encode genes for  
257 carotenoid biosynthesis allowing the possibility of a carotenoid antenna that is the hallmark of  
258 xanthorhodopsins [43–45]. Of the residues involved with binding salinixanthin (the predominant  
259 carotenoid of *Salinibacter ruber*), we found a surprisingly high number conserved (10 identical out  
260 of 12 in at least one rhodopsin sequence) (Supplementary Figure S8D), suggesting that a  
261 carotenoid antenna may be bound, making at least some of these sequences *bonafide*  
262 xanthorhodopsins.

263 Even representatives of CL500-11 and TK10 that are primarily found in the hypolimnion during  
264 stratification are capable of phototrophy, however, they can potentially access the photic zone  
265 during winter and early spring mixis. Apart from rhodopsin-based photoheterotrophy, we also  
266 retrieved MAGs of the class *Chloroflexia* encoding genes for photosystem type II reaction center  
267 proteins L and M (pufL and pufM), bacteriochlorophyll and carotenoid biosynthesis. The pufM gene  
268 sequences cluster together with other *Chloroflexi*-related pufM sequences (Supplementary Figure  
269 S9). However, no evidence for carbon fixation, either via the 3-hydroxypropionate pathway or the  
270 Calvin-Benson cycle was found in any photosystem bearing MAG which might be a consequence of

271 MAG incompleteness. It may also be that these are aerobic anoxygenic phototrophs that do not fix  
272 carbon e.g. freshwater *Gemmatimonadetes* and *Acidobacteria* (both aerobic) [46].

### 273 **Evolutionary history of pelagic *Chloroflexi***

274 It is apparent from the phylogenomic analyses that the collection of representatives of the phylum  
275 *Chloroflexi* recovered in this work, along with the existing genome sequences from isolates and  
276 MAGs, offers only a partial sketch of the complex evolutionary history of the phylum at large. For  
277 example, the most divergent branches 'Ca. Limnocyndria' (SL56 cluster) and 'Ca. Umbricyclopia'  
278 (TK10 cluster) have practically no close kin apart from an aquifer sediment MAG (related to 'Ca.  
279 Limnocyndria'). However, related 16S rRNA clones have been recovered from soil/sediments for  
280 both these groups, suggesting transitions to a pelagic lifestyle. Factoring the absence of related  
281 marine 16S rRNA sequences for these groups, in addition to their undetectability in marine  
282 metagenomic datasets also suggests an ancestry from soil/sediment rather than the saline  
283 environment. While the possibility of a marine origin cannot be formally excluded, the directionality  
284 of a transition from soil/sediment to freshwater water columns appears most likely. Moreover,  
285 given that 'Ca. Limnocyndria' and 'Ca. Umbricyclopia' diverge prior to the divergence of the classes  
286 *Dehalococcoidea* and marine SAR202 (class 'Ca. Monstramaria'), which are the only ecologically  
287 relevant marine *Chloroflexi* known as yet (the former in marine sediments and the latter in deep  
288 ocean water column), it is likely that ancestral *Chloroflexi* originated in a soil/sediment habitat. The  
289 success of marine SAR202 in the deep oceans is remarkable, it is the most widely distributed,  
290 perhaps numerically most abundant *Chloroflexi* group on the planet. However, some 16S rRNA  
291 sequences from its closest relatives, *Dehalococcoidea*, have also been recovered from freshwater  
292 sediments, even though the vast majority appear to be from deep marine sediments (both anoxic  
293 habitats).

294 In this study, we significantly expand our conceptions regarding the diversity of pelagic *Chloroflexi*  
295 and their possible origins from soil/sediment habitats. Similar evolutionary trajectories are  
296 beginning to be visible for other freshwater microbes, e.g. the closest relatives of freshwater  
297 *Actinobacteria* ('Ca. Nanopelagicales' [2]) being soil *Actinobacteria* or the transition of  
298 methylotrophic *Betaproteobacteria* ('Ca. Methylopumilus') from sediments to the water column [4,

299 47], and as more and more prokaryotic groups are examined and the study is expanded to the  
300 sediment and soil habitats we will finally be able to reconstruct the sequence of events that have  
301 led to the complex mosaic of freshwater microbial communities as we see them today.

302

## 303 **Methods**

304 **Sample collection.** Řimov reservoir: Representative water samples of epilimnion (0.5m) and  
305 hypolimnion (30m) were taken on April 20<sup>th</sup> 2016 from this mesoeutrophic reservoir (South  
306 Bohemia, Czech Republic). The sampling site is located at the deepest part (43m) of the reservoir  
307 250m from the dam. For more detail about the reservoir see the reference [48].

308 Lake Zurich: Samples from this oligo-mesotrophic Lake (Switzerland) were collected on October  
309 13<sup>th</sup> 2010 (5m depth), May 13<sup>th</sup> 2013 (5m and 80m depth), November 3<sup>rd</sup> 2015 (5m and 40-80m  
310 depth), and March 17<sup>th</sup> 2017 (2m depth). The sampling site is located at the deepest part (136m)  
311 of Lake Zurich.

312 Lake Biwa: Samples from this mesotrophic Lake were collected at a pelagic station (35° 12'58" N  
313 135° 59'55" E; water depth = ca. 73m) in 2016. Samples from the epilimnion (5m depth) were  
314 taken on July 20<sup>th</sup>, August 18<sup>th</sup>, and September 27<sup>th</sup>. Samples from the hypolimnion (65m) were  
315 taken on September 13<sup>th</sup>, October 11<sup>th</sup>, November 17<sup>th</sup>, and December 12<sup>th</sup>.

316 All water samples were sequentially pre-filtered through 20 and 5 µm pore-size filters and the flow-  
317 through microbial community was concentrated on 0.22 µm filters (polycarbonate (PCTE)  
318 membrane filters, Sterlitech, USA, for Řimov and Zurich samples and polyethersulfone filter  
319 cartridges (Millipore Sterivex SVGP01050) for Lake Biwa samples. DNA extraction of Řimov  
320 reservoir and Lake Zurich samples was performed using the standard phenol-chloroform protocol  
321 [49]. For samples from Lake Biwa, DNA was extracted by PowerSoil DNA Isolation Kit (MoBio  
322 Laboratories, Carlsbad, CA, USA). Sequencing of the samples from the Řimov reservoir (n=2) and  
323 Lake Zurich (n=2) was performed using Illumina HiSeq4000 (2x151bp, BGI Genomics, Hong Kong,  
324 China), additional samples from Lake Zurich (n=4) were sequenced using Illumina HiSeq2000  
325 (2x150X bp, Functional Genomics Center, Zurich, Switzerland) and Lake Biwa samples (n=7) were  
326 sequenced using MiSeq (2x300bp, Bioengineering Lab. Co., Ltd. Kanagawa, Japan).

327 Basic metadata (sampling date, latitude, longitude, depth, bioproject identifiers, SRA accessions),  
328 and sequence statistics (number of reads, read length, dataset size) of all metagenomes generated  
329 in this study are provided in Supplementary Table S3.

330 **Unassembled 16S rRNA read classification.** A non-redundant version of the  
331 SILVA\_128\_SSURef\_NR99 database [21] was created by clustering its 645'151 16S rRNA gene  
332 sequences into 7'552 sequences at 85% nucleotide identity level using UCLUST [50]. Ten million  
333 reads from each dataset were compared to this reduced set and an e-value cutoff of 1e-5 was used  
334 to identify candidate 16S rRNA gene sequences. If a dataset had less than 10 million reads, all  
335 reads from the dataset were used to identify candidate sequences. These candidate sequences  
336 were further examined using ssu-align, and segregated into archaeal, bacterial, and eukaryotic  
337 16S/18S rRNA or non-16S rRNA gene sequences [51]. The bona fide prokaryotic 16S rRNA  
338 sequences were compared to the complete SILVA database using BLASTN [52] and classified into  
339 a high level taxon if the sequence identity was  $\geq 80\%$  and the alignment length was  $\geq 90$  bp.  
340 Sequences failing these thresholds were discarded. The 16S rRNA reads belonging to the phylum  
341 *Chloroflexi* were furtherly segregated to lower taxonomic levels of the SILVA taxonomy.

342 **Assembled 16S rRNA sequences from the freshwater metagenomes and 16S rRNA gene**  
343 **phylogeny.** Assembled 16S rRNA sequences of the 120 assembled freshwater datasets were  
344 identified using Barrnap with default parameters (<https://github.com/tseemann/barrnap>). Genes  
345 encoding 16S rRNA were aligned using the SINA web aligner [53], imported to ARB [54] using the  
346 SILVA\_128\_SSURef\_NR99 database [21], manually checked, and bootstrapped maximum  
347 likelihood trees (GTR-GAMMA model, 100 bootstraps) were calculated with RAxML [55].

348 **Collection of depth profile samples for CARD-FISH analyses.** Řimov Reservoir was sampled four  
349 times in 2015, during the spring phytoplankton bloom (April 14<sup>th</sup>), early summer (June 16<sup>th</sup>), late  
350 summer (August 10<sup>th</sup>), and autumn (November 04<sup>th</sup>). Vertical profiles of physicochemical  
351 parameters were taken by a YSI multiprobe (Yellow Springs Instruments, model 6600, Yellow  
352 Springs, OH, USA) and profiles of different phytoplankton groups differentiated by their fluorescent  
353 spectra were obtained with a fluorescence probe (FluoroProbe, TS-16-12, bbe Moldaenke GmbH,

354 Schwentinental, Germany). Water samples were taken from 0, 5, 10, 20, 30, and 40m depths  
355 (n=28).

356 Lake Zurich was sampled five times in 2015, during winter mixis (February 4<sup>th</sup>), the spring  
357 phytoplankton bloom (April 15<sup>th</sup>), early summer (June 11<sup>th</sup>), late summer (August 11<sup>th</sup>), and autumn  
358 (November 03<sup>th</sup>). Sampling included vertical profiles of physicochemical parameters using a YSI  
359 multiprobe (Yellow Springs Instruments, model 6600, Yellow Springs, OH, USA) and profiles of four  
360 phytoplankton groups (*Planktothrix rubescens*, green algae, diatoms and cryptophytes)  
361 differentiated by different fluorescent spectra using a submersible fluorescence probe  
362 (FluoroProbe, TS-16-12, bbe Moldaenke GmbH, Schwentinental, Germany). Water samples for  
363 bacterial analyses were taken from 0, 5, 10, 20, 30, 40, 60, 80, and 100m (n=45).

364 CARD-FISH samples from Lake Biwa were taken at the same occasion as the metagenomic  
365 samples. In the present study, only the hypolimnetic samples were analyzed (September, October,  
366 November, and December 2016 at 65 m depth)

367 **Design and application of novel specific 16S rRNA probes for different *Chloroflexi* clusters.** CARD-  
368 FISH (fluorescence *in situ* hybridization followed by catalyzed reporter deposition) with fluorescein-  
369 labeled tyramides was conducted as previously described [56] with a probe specific for the CL500-  
370 11 cluster of *Chloroflexi* [13] and three novel probes targeting the lineages SL56, JG30-KF-CM66,  
371 and TK10 (see Supplementary Table S4 for details). A total of 54 16S rRNA sequences from  
372 multiple groups of freshwater *Chloroflexi* (e.g. CL500-11, SL56, TK10, and JG30-KF-CM66,  
373 Supplementary Figure S1A), were extracted from MAGs (n=7) or unbinned *Chloroflexi* contigs  
374 (n=47). These additional sequences were used to supplement a local reference database for  
375 prokaryotes (see methods) and design FISH probes for these groups. Probe design based on 16S  
376 rRNA genes was done in ARB [54]. A bootstrapped maximum likelihood tree (GTR-GAMMA model)  
377 of 16S rDNA sequences (Supplementary Figure S1) served as backbone for probe design with the  
378 ARB tools `probe_design` and `probe_check`. The resulting probes with their corresponding competitor  
379 and helper oligonucleotides (Supplementary Table S4) were tested with different formamide  
380 concentrations to achieve stringent hybridization conditions. CARD-FISH stained samples were  
381 analyzed by fully automated high-throughput microscopy [56]. Images were analyzed with the freely



382 available image analysis software ACMEtool 216 (technobiology.ch), and interfering  
383 autofluorescent cyanobacteria or debris particle were individually excluded from hybridized cells.  
384 At least 10 high quality images or >1000 DAPI stained bacteria were analyzed per sample. Cell  
385 sizes of CARD-FISH stained *Chloroflexi* CL500-11 and all prokaryotes were measured from one  
386 depth profile from Lake Zurich (November 3<sup>rd</sup> 2015) with the software LUCIA (Laboratory Imaging  
387 Prague, Czech Republic) following a previously described workflow [57]. At least 200 individual  
388 DAPI stained cells (corresponding to 24-65 CL500-11 cells) per sample were subjected to image  
389 analysis. Total numbers of heterotrophic prokaryotes were determined by an inFlux V-GS 225 cell  
390 sorter (Becton Dickinson) equipped with a UV (355nm) laser. Subsamples of 1 ml were stained with  
391 4',6-Diamidino-2-phenylindole (DAPI, 1 µg ml<sup>-1</sup> final concentration), and scatter plots of DAPI  
392 fluorescence vs. 90° light scatter were analyzed with an in-house software (J. Villiger, unpublished).  
393 **Metagenome assembly.** Lake Biwa (7 datasets) and Lake Zurich (4 datasets) were assembled using  
394 metaSPAdes (-k 21,33,55,77,99,127)[58]. All other datasets, including those from the Řimov  
395 Reservoir, were assembled using megahit (-k-min 39 -k-max 99/ 151 -k-step 10 -min-count 2). A  
396 complete list of all metagenomic datasets assembled in this study (n=57) is shown in  
397 Supplementary Table S1. Prior to assembly, all datasets were quality trimmed either using sickle  
398 (<https://github.com/najoshi/sickle>, default parameters), or for Lake Zurich and Lake Biwa  
399 metagenomes, Trimmomatic [59] was used to remove adaptor sequences, followed by 3' end  
400 quality-trim using PRINSEQ [60] (quality threshold = 20; sliding window size = 6) (also indicated in  
401 the Supplementary Table S3).  
402 **Gene prediction and taxonomic analyses.** Prodigal (in metagenomic mode) was used for predicting  
403 protein coding genes in the assembled contigs [61]. All predicted proteins were compared to the  
404 NCBI-NR database using MMSeqs2 (e-value 1e-3) [62] to ascertain taxonomic origins of assembled  
405 contigs.  
406 **Metagenomic assembled genome (MAG) reconstruction.** Only contigs longer than 5 kb were used  
407 for genome reconstructions. A contig was considered to belong to the phylum *Chloroflexi* if a  
408 majority of its genes gave best hits to this phylum. *Chloroflexi* affiliated contigs within each dataset  
409 were grouped based on the tetra-nucleotide frequencies and contig coverage pattern in different



410 metagenomes using MetaBAT with “superspecific” setting [63]. Preliminary genome annotation for  
411 all bins was performed using Prokka [64]. Additional functional gene annotation for all *Chloroflexi*  
412 bins was performed by comparisons against COG hmms [65] using an e-value cutoff of  $1e-5$ , and  
413 TIGRFams models [66] (using trusted score cutoffs `-cut_tc`) using the hmmer package [67]. The  
414 assembled genomes were also annotated using the RAST server [68] and BlastKOALA [69].  
415 Enzyme EC numbers were predicted using PRIAM [70].

416 **Genome quality check, size estimation and phylogenomics.** CheckM [71] was used to estimate  
417 genome completeness. A reference phylogenomic tree was made by inserting complete genomes  
418 of representatives from all known *Chloroflexi* classes and reconstructed MAGs of this study (with  
419 estimated completeness of 30% and higher) to the built-in tree of life in PhyloPhIAn [72].  
420 PhyloPhIAn uses USEARCH [50] to identify the conserved proteins and subsequent alignments  
421 against the built-in database are performed using MUSCLE [73]. Finally, an approximate maximum-  
422 likelihood tree is generated using FastTree [74] with local support values using Shimodaira-  
423 Hasegawa test [75]. This analysis confirmed that all reconstructed MAGs belong to the phylum  
424 *Chloroflexi* and also suggests their phylogenetic affiliations within the phylum.

425 **Metagenomic fragment recruitment.** To avoid bias in abundance estimations owing to the presence  
426 of highly related rRNA sequences in the genomes/metagenomes, rRNA sequences in all genomes  
427 were masked. After masking, recruitments were performed using BLASTN [52], and a hit was  
428 considered only when it was at least 50 bp long, had an identity of  $>95\%$  and an e-value of  $\leq 1e-5$ .  
429 These cutoffs approximate species-level divergence [76]. These hits were used to compute the  
430 RPKG (reads recruited per kilobase of genome per gigabase of metagenome) values that reflect  
431 abundances that are normalized and comparable across genomes and metagenomes of different  
432 sizes.

433 **Single gene phylogeny and average nucleotide identity (ANI).** The *pufM* and rhodopsin protein  
434 sequence alignments were performed using MUSCLE [73], and FastTree2 [74] was used for  
435 creating the maximum-likelihood tree (JTT+CAT model, gamma approximation, 100 bootstrap  
436 replicates). Average Nucleotide Identity (ANI) was calculated as defined in [76].

437

438 **Availability of supporting data** The. The metagenomic Raw read files of the epilimnion and  
439 hypolimnion of Římov reservoir, Lake Zurich and Lake Biwa are archived at the  
440 DDBJ/EMBL/GenBank and can be accessed under the Bioprojects PRJNA429141, PRJNA428721  
441 and PRJDB6644 respectively. All assembled genomic bins of this study can be accessed under the  
442 Bioproject PRJNA356693.

443

444 **Ethics approval.** Ethics approval was not required for the study.

445

446 **Competing interests.** The authors declare that they have no competing interests.

447

448 **Author contributions.** M.M. and R.G. conceived and designed the research. M.M., Y.O., S.H.N,  
449 M.M.S., R.G., K.S., were involved in sampling, sample processing and filtration. M.M., M.M.S., Y.O.,  
450 A.S.A and R.G. performed metagenomic data analyses. M.M.S. and Y.O. performed CARD-FISH  
451 analyses. M.M, M.M.S. and R.G wrote the manuscript with input from all authors. All authors read  
452 and approved the final text.

453

454 **Acknowledgements.** The authors thank P. Znachor, P. Rychtecký, T. Shabarova, and J. Nedoma for  
455 help with sampling of the Římov Reservoir and E. Loher and T. Posch for help with sampling of Lake  
456 Zurich. S. Neuenschwander is acknowledged for help with metagenomic library preparation of Lake  
457 Zurich. Aharon Oren is acknowledged for taxa nomenclature review. M.M. was supported by the  
458 Czech Academy of Sciences (Postdoc program PPPLZ application number L200961651). R.G.,  
459 A.S.A. and K.S. and were supported by the research grants 17-04828S and 13-00243S from the  
460 Grant Agency of the Czech Republic. The collaborative work of M.M., Y.O., S.H.N., and K.S. was  
461 supported by JSPS Bilateral Joint Research Project No. JSPS-17-17. Y.O. and S.H.N. were supported  
462 by Environment Research and Technology Development Fund No 5-1607 of the Ministry of the  
463 Environment, Japan. Y.O. was also supported by JSPS KAKENHI Grant No 15J00971 and by The  
464 Kyoto University Foundation. Computation time was partially provided by the Super Computer  
465 System, Institute for Chemical Research, Kyoto University.

466 **References**

- 467 1. Ghai R, Mizuno CM, Picazo A, Camacho A, Rodriguez-Valera F. Key roles for freshwater  
468 Actinobacteria revealed by deep metagenomic sequencing. *Mol Ecol.* 2014;23:6073–90.
- 469 2. Neuenschwander SM, Ghai R, Pernthaler J, Salcher MM. Microdiversification in genome-  
470 streamlined ubiquitous freshwater Actinobacteria. *ISME J.* 2017;:1–14.  
471 doi:10.1038/ismej.2017.156.
- 472 3. Salcher MM, Posch T, Pernthaler J. In situ substrate preferences of abundant bacterioplankton  
473 populations in a prealpine freshwater lake. *ISME J.* 2013;7:896–907.  
474 doi:10.1038/ismej.2012.162.
- 475 4. Salcher MM, Neuenschwander SM, Posch T, Pernthaler J. The ecology of pelagic freshwater  
476 methylotrophs assessed by a high-resolution monitoring and isolation campaign. *ISME J.*  
477 2015;9:2442–53. doi:10.1038/ismej.2015.55.
- 478 5. Kasalický V, Jezbera J, Hahn MW, Šimek K. The diversity of the *Limnohabitans* genus, an  
479 important group of freshwater bacterioplankton, by characterization of 35 isolated strains. *PLoS*  
480 *One.* 2013;8:e58209. doi:10.1371/journal.pone.0058209.
- 481 6. Hoetzing M, Schmidt J, Jezberová J, Koll U, Hahn MW. Microdiversification of a pelagic  
482 *Polynucleobacter* species is mainly driven by acquisition of genomic islands from a partially  
483 interspecific gene pool. *Appl Environ Microbiol.* 2017;83:e02266-16. doi:10.1128/AEM.02266-  
484 16.
- 485 7. Salcher MM, Pernthaler J, Posch T. Seasonal bloom dynamics and ecophysiology of the  
486 freshwater sister clade of SAR11 bacteria “that rule the waves” (LD12). *ISME J.* 2011;5:1242–52.  
487 doi:10.1038/ismej.2011.8.
- 488 8. Henson MW, Lanclos VC, Faircloth BC, Thrash JC. Cultivation and genomics of the first freshwater  
489 SAR11 (LD12) isolate. <http://dx.doi.org/10.1101/093567>. 2016; January:1–24.
- 490 9. Ghylis TW, Garcia SL, Moya F, Oyserman BO, Schwientek P, Forest KT, et al. Comparative single-  
491 cell genomics reveals potential ecological niches for the freshwater actinobacteria lineage.  
492 *ISME J.* 2014;8:2503–16. doi:10.1038/ismej.2014.135.
- 493 10. Cabello-Yeves PJ, Ghai R, Mehrshad M, Picazo A, Camacho A, Rodriguez-valera F.

- 494 Reconstruction of diverse verrucomicrobial genomes from metagenome datasets of freshwater  
495 reservoirs. *Front Microbiol.* 2017.
- 496 11. Urbach E, Vergin KL, Young L, Morse A, Larson GL, Giovannoni SJ. Unusual bacterioplankton  
497 community structure in ultra-oligotrophic Crater Lake. *Limnol Oceanogr.* 2001;46:557–72.
- 498 12. Urbach E, Vergin KL, Larson GL, Giovannoni SJ. Bacterioplankton communities of Crater Lake,  
499 OR: Dynamic changes with euphotic zone food web structure and stable deep water populations.  
500 *Hydrobiologia.* 2007;574:161–77.
- 501 13. Okazaki Y, Hodoki Y, Nakano SI. Seasonal dominance of CL500-11 bacterioplankton (phylum  
502 Chloroflexi) in the oxygenated hypolimnion of Lake Biwa, Japan. *FEMS Microbiol Ecol.* 2013;83:82–  
503 92.
- 504 14. Okazaki Y, Nakano SI. Vertical partitioning of freshwater bacterioplankton community in a deep  
505 mesotrophic lake with a fully oxygenated hypolimnion (Lake Biwa, Japan). *Environ Microbiol Rep.*  
506 2016;8:780–8.
- 507 15. Okazaki Y, Fujinaga S, Tanaka A, Kohzu A, Oyagi H. Ubiquity and quantitative significance of  
508 bacterioplankton lineages inhabiting the oxygenated hypolimnion of deep freshwater lakes. *Nat*  
509 *Publ Gr.* 2017;;1–15. doi:10.1038/ismej.2017.89.
- 510 16. Deneff VJ, Mueller RS, Chiang E, Liebig JR, Vanderploeg HA. Chloroflexi CL500-11 Populations  
511 That Predominate Deep-Lake Hypolimnion Bacterioplankton Rely on Nitrogen-Rich Dissolved  
512 Organic Matter Metabolism and C<sub>1</sub> Compound Oxidation. *Appl Environ Microbiol.* 2016;82:1423–  
513 32. doi:10.1128/AEM.03014-15.
- 514 17. Landry Z, Swan BK, Herndl GJ, Stepanauskas R, Giovannoni SJ. SAR202 Genomes from the  
515 Dark Ocean Predict Pathways for the Oxidation of Recalcitrant Dissolved Organic Matter. *MBio.*  
516 2017;8:e00413-17. doi:10.1128/mBio.00413-17.
- 517 18. Deneff VJ, Fujimoto M, Berry MA, Schmidt ML. Seasonal Succession Leads to Habitat-Dependent  
518 Differentiation in Ribosomal RNA: DNA Ratios among Freshwater Lake Bacteria. *Front Microbiol.*  
519 2016;7 April:1–13.
- 520 19. Tang X, Chao J, Gong Y, Wang Y, Wilhelm SW, Gao G. Spatiotemporal dynamics of bacterial  
521 community composition in large shallow eutrophic Lake Taihu: High overlap between free-living and

- 522 particle-attached assemblages. *Limnol Oceanogr.* 2017;62:1366–82.
- 523 20. Han M, Gong Y, Zhou C, Zhang J, Wang Z, Ning K. Comparison and Interpretation of Taxonomical  
524 Structure of Bacterial Communities in Two Types of Lakes on Yun-Gui plateau of China. *Nat Publ*  
525 *Gr.* 2016; April:1–12. doi:10.1038/srep30616.
- 526 21. Pruesse E, Quast C, Knittel K, Fuchs BM, Ludwig W, Peplies J, et al. SILVA: A comprehensive  
527 online resource for quality checked and aligned ribosomal RNA sequence data compatible with  
528 ARB. *Nucleic Acids Res.* 2007;35:7188–96.
- 529 22. Gernert C, Glockner FO, Krohne G, Hentschel U. Microbial Diversity of the Freshwater Sponge  
530 *Spongilla lacustris*. *Microb Ecol.* 2005;50:206–12.
- 531 23. Rusch DB, Halpern AL, Sutton G, Heidelberg KB, Williamson S, Yoosaph S, et al. The Sorcerer II  
532 Global Ocean Sampling expedition: northwest Atlantic through eastern tropical Pacific. *PLoS Biol.*  
533 2007;5:e77. doi:10.1371/journal.pbio.0050077.
- 534 24. Morris RM, Rappé MS, Urbach E, Connon SA, Rappe MS, Giovannoni SJ. Prevalence of the  
535 Chloroflexi-Related SAR202 Bacterioplankton Cluster throughout the Mesopelagic Zone and Deep  
536 Ocean. *Appl Env Microbiol.* 2004;70:2836–42.
- 537 25. Schattenhofer M, Fuchs BM, Amann R, Zubkov M V., Tarran GA, Pernthaler J. Latitudinal  
538 distribution of prokaryotic picoplankton populations in the Atlantic Ocean. *Environ Microbiol.*  
539 2009;11:2078–93.
- 540 26. Mehrshad M, Rodriguez-Valera F, Amoozegar MA, López-García P, Ghai R. The enigmatic  
541 SAR202 cluster up close : shedding light on a globally distributed dark ocean lineage involved in  
542 sulfur cycling. *ISME J.* 2017.
- 543 27. Lozupone CA, Knight R. Global patterns in bacterial diversity. *Proc Natl Acad Sci.*  
544 2007;104:11436–40.
- 545 28. Walsh DA, Lafontaine J, Grossart H-P. On the Eco-Evolutionary Relationships of Fresh and Salt  
546 Water Bacteria and the Role of Gene Transfer in Their Adaptation. In: Gophna U, editor. *Lateral*  
547 *Gene Transfer in Evolution.* New York, NY: Springer New York; 2013. p. 55–77. doi:10.1007/978-  
548 1-4614-7780-8\_3.
- 549 29. Salcher MM, Neuenschwander SM, Posch T, Pernthaler J. The ecology of pelagic freshwater

- 550 methylotrophs assessed by a high-resolution monitoring and isolation campaign. *ISME J.*  
551 2015;9:2442–53. doi:10.1038/ismej.2015.55.
- 552 30. Logares R, Bråte J, Bertilsson S, Clasen JL, Shalchian-Tabrizi K, Rengefors K. Infrequent  
553 marine–freshwater transitions in the microbial world. *Trends Microbiol.* 2009;17:414–22.  
554 doi:<http://dx.doi.org/10.1016/j.tim.2009.05.010>.
- 555 31. Eiler A, Mondav R, Sinclair L, Fernandez-Vidal L, Scofield DG, Schwientek P, et al. Tuning fresh:  
556 Radiation through rewiring of central metabolism in streamlined bacteria. *ISME J.* 2016;10:1902–  
557 14. doi:10.1038/ismej.2015.260.
- 558 32. Posch T, Köster O, Salcher MM, Pernthaler J. Harmful filamentous cyanobacteria favoured by  
559 reduced water turnover with lake warming. *Nat Clim Chang.* 2012;2:809–13.  
560 doi:10.1038/nclimate1581.
- 561 33. Hug LA, Thomas BC, Sharon I, Brown CT, Sharma R, Hettich RL, et al. Critical biogeochemical  
562 functions in the subsurface are associated with bacteria from new phyla and little studied lineages.  
563 *Environ Microbiol.* 2016;18:159–73.
- 564 34. Tripp HJ, Kitner JB, Schwalbach MS, Dacey JWH, Wilhelm LJ, Giovannoni SJ. SAR11 marine  
565 bacteria require exogenous reduced sulphur for growth. *Nature.* 2008;452:741–4.  
566 doi:10.1038/nature06776.
- 567 35. Doxey AC, Kurtz D a, Lynch MD, Sauder L a, Neufeld JD. Aquatic metagenomes implicate  
568 Thaumarchaeota in global cobalamin production. *ISME J.* 2014;;1–11.  
569 doi:10.1038/ismej.2014.142.
- 570 36. Qin W, Amin SA, Lundeen RA, Heal KR, Martens-habbena W, Turkarslan S, et al. Stress response  
571 of a marine ammonia-oxidizing archaeon informs physiological status of environmental  
572 populations. *Nat Publ Gr.* 2017; June:1–12. doi:10.1038/ismej.2017.186.
- 573 37. Roth JR, Lawrence JG, Bobik TA. COBALAMIN ( COENZYME B 12 ): Synthesis and Biological  
574 Significance. 1996.
- 575 38. Morris JJ, Lenski RE, Zinser ER. The Black Queen Hypothesis: Evolution of Dependencies  
576 through Adaptive Gene Loss. *MBio.* 2012;3:1–7.
- 577 39. Men Y, Seth EC, Yi S, Allen RH, Taga ME, Alvarez-cohen L. Sustainable Growth of

- 578 Dehalococcoides mccartyi 195 by Corrinoid Salvaging and Remodeling in Defined Lactate-  
579 Fermenting Consortia. Appl Environmantal Microbiol. 2014;80:2133–41.
- 580 40. Escalante-Semerena JC. Conversion of cobinamide into adenosylcobamide in bacteria and  
581 archaea. J Bacteriol. 2007;189:4555–60.
- 582 41. Wu D, Raymond J, Wu M, Chatterji S, Ren Q, Graham JE, et al. Complete genome sequence of  
583 the aerobic CO-oxidizing thermophile Thermomicrobium roseum. PLoS One. 2009;4:e4207.
- 584 42. Sutcliffe IC. Cell envelope architecture in the Chloroflexi: A shifting frontline in a phylogenetic  
585 turf war. Environ Microbiol. 2011;13:279–82.
- 586 43. Balashov SP, Imasheva ES, Boichenko V a, Antón J, Wang JM, Lanyi JK. Xanthorhodopsin: a  
587 proton pump with a light-harvesting carotenoid antenna. Science. 2005;309:2061–4.  
588 doi:10.1126/science.11118046.
- 589 44. Balashov SP, Lanyi JK. Xanthorhodopsin: Proton pump with a carotenoid antenna. Cell Mol Life  
590 Sci. 2007;64:2323–8.
- 591 45. Boichenko VA, Wang JM, Antón J, Lanyi JK, Balashov SP. Functions of Carotenoids in  
592 Xanthorhodopsin and Archaerhodopsin, from Action Spectra of Photoinhibition of Cell Respiration.  
593 Biochim Biophys Acta. 2006;1757:1649–1656.
- 594 46. Zeng Y, Feng F, Medová H, Dean J, Koblížek M. Functional type 2 photosynthetic reaction  
595 centers found in the rare bacterial phylum Gemmatimonadetes. Pnas. 2014;111:7795–800.
- 596 47. Walsh DA, Lafontaine J, Grossart H-P. On the Eco-Evolutionary Relationships of Fresh and Salt  
597 Water Bacteria and the Role of Gene Transfer in Their Adaptation. In: Gophna U, editor. Lateral  
598 Gene Transfer in Evolution. New York, NY: Springer New York; 2013. p. 55–77.
- 599 48. Simek K, Bobková J, Macek M, Nedoma J, Psenner R. Ciliate grazing on picoplankton in a  
600 eutrophic reservoir during the summer phytoplankton maximum: A study at the species and  
601 community level. Limnol Oceanogr. 1995;40:1077–90.
- 602 49. Martín-Cuadrado A-B, López-García P, Alba J-C, Moreira D, Monticelli L, Strittmatter A, et al.  
603 Metagenomics of the deep Mediterranean, a warm bathypelagic habitat. PLoS One. 2007;2:e914.  
604 doi:10.1371/journal.pone.0000914.
- 605 50. Edgar RC. Search and clustering orders of magnitude faster than BLAST. Bioinformatics.



- 606 2010;26:2460–1. doi:10.1093/bioinformatics/btq461.
- 607 51. Nawrocki E. Structural RNA Homology Search and Alignment Using Covariance Models.  
608 Washington University in ST. Louis; 2009.
- 609 52. Altschul SF, Madden TL, Schäffer AA, Zhang J, Zhang Z, Miller W, et al. Gapped BLAST and PSI-  
610 BLAST : a new generation of protein database search programs. *Nucleic Acids Res.* 1997;25:3389–  
611 402.
- 612 53. Pruesse E, Peplies J, Glöckner FO. SINA: Accurate high-throughput multiple sequence alignment  
613 of ribosomal RNA genes. *Bioinformatics.* 2012;28:1823–9.
- 614 54. Ludwig W, Strunk O, Westram R, Richter L, Meier H, Yadhukumar A, et al. ARB: A software  
615 environment for sequence data. *Nucleic Acids Res.* 2004;32:1363–71.
- 616 55. Stamatakis A, Ludwig T, Meier H. RAxML-II: A program for sequential, parallel and distributed  
617 inference of large phylogenetic trees. *Concurr Comput Pract Exp.* 2005;17:1705–23.
- 618 56. Zeder M, Pernthaler J. Multispot live-image autofocusing for high-throughput microscopy of  
619 fluorescently stained bacteria. *Cytom Part A.* 2009;75:781–8.
- 620 57. Posch T, Franzoi J, Prader M, Salcher MM. New image analysis tool to study biomass and  
621 morphotypes of three major bacterioplankton groups in an alpine lake. *Aquat Microb Ecol.*  
622 2009;54:113–26.
- 623 58. Nurk S, Meleshko D, Korobeynikov A, Pevzner PA. metaSPAdes: a new versatile metagenomic  
624 assembler. 2017;;824–34.
- 625 59. Bolger AM, Lohse M, Usadel B. Genome analysis Trimmomatic : a flexible trimmer for Illumina  
626 sequence data. 2014;30:2114–20.
- 627 60. Schmieder R, Edwards R. Quality control and preprocessing of metagenomic datasets.  
628 *Bioinformatics.* 2011;27:863–4.
- 629 61. Hyatt D, Chen G-L, LoCascio PF, Land ML, Larimer FW, Hauser LJ. Prodigal: prokaryotic gene  
630 recognition and translation initiation site identification. *BMC Bioinformatics.* 2010;11:119.  
631 doi:10.1186/1471-2105-11-119.
- 632 62. Steinegger M, Söding J. MMseqs2 enables sensitive protein sequence searching for the  
633 analysis of massive data sets. *Nat Biotechnol.* 2017;35:1026–1028.

- 634 63. Kang DD, Froula J, Egan R, Wang Z. MetaBAT, an efficient tool for accurately reconstructing  
635 single genomes from complex microbial communities. *PeerJ*. 2015;3:e1165.  
636 doi:10.7717/peerj.1165.
- 637 64. Seemann T. Prokka: Rapid prokaryotic genome annotation. *Bioinformatics*. 2014;30:2068–9.
- 638 65. Tatusov RL, Natale DA, Garkavtsev I V, Tatusova TA, Shankavaram UT, Rao BS, et al. The COG  
639 database : new developments in phylogenetic classification of proteins from complete genomes.  
640 *Nucleic Acids Res*. 2001;29:22–8.
- 641 66. Haft DH, Loftus BJ, Richardson DL, Yang F, Eisen JA, Paulsen IT, et al. TIGRFAMs : a protein  
642 family resource for the functional identification of proteins. *Nucleic Acids Res*. 2001;29:41–3.
- 643 67. Eddy SR. Accelerated profile HMM searches. *PLoS Comput Biol*. 2011;7:e1002195.
- 644 68. Aziz RK, Bartels D, Best A a, DeJongh M, Disz T, Edwards R a, et al. The RAST Server: rapid  
645 annotations using subsystems technology. *BMC Genomics*. 2008;9:75. doi:10.1186/1471-2164-  
646 9-75.
- 647 69. Kanehisa M, Sato Y, Morishima K. BlastKOALA and GhostKOALA: KEGG Tools for Functional  
648 Characterization of Genome and Metagenome Sequences. *J Mol Biol*. 2016;428:726–31.  
649 doi:10.1016/j.jmb.2015.11.006.
- 650 70. Claudel-Renard C, Chevalet C, Faraut T, Kahn D. Enzyme-specific profiles for genome  
651 annotation: PRIAM. *Nucleic Acids Res*. 2003;31:6633–9.
- 652 71. Parks DH, Imelfort M, Skennerton CT, Hugenholtz P, Tyson GW. CheckM: assessing the quality  
653 of microbial genomes recovered from isolates, single cells, and metagenomes. *Genome Res*.  
654 2015;25:1043–55. doi:10.1101/gr.186072.114.
- 655 72. Segata N, Börnigen D, Morgan XC, Huttenhower C. PhyloPhlAn is a new method for improved  
656 phylogenetic and taxonomic placement of microbes. *Nat Commun*. 2013;4:2304.  
657 doi:10.1038/ncomms3304.
- 658 73. Edgar RC. MUSCLE: multiple sequence alignment with high accuracy and high throughput.  
659 *Nucleic Acid Res*. 2004;32:1792–7.
- 660 74. Price MN, Dehal PS, Arkin AP. FastTree 2—approximately maximum-likelihood trees for large  
661 alignments. *PLoS One*. 2010;5:e9490. doi:10.1371/journal.pone.0009490.

662 75. Shimodaira H, Hasegawa M. Multiple Comparisons of Log-Likelihoods with Applications to  
663 Phylogenetic Inference. *Mol Biol Evol.* 1999;16:1114–6.

664 76. Konstantinidis KT, Tiedje JM. Genomic insights that advance the species definition for  
665 prokaryotes. *Proc Natl Acad Sci U S A.* 2005;102:2567–72. doi:10.1073/pnas.0409727102.

666

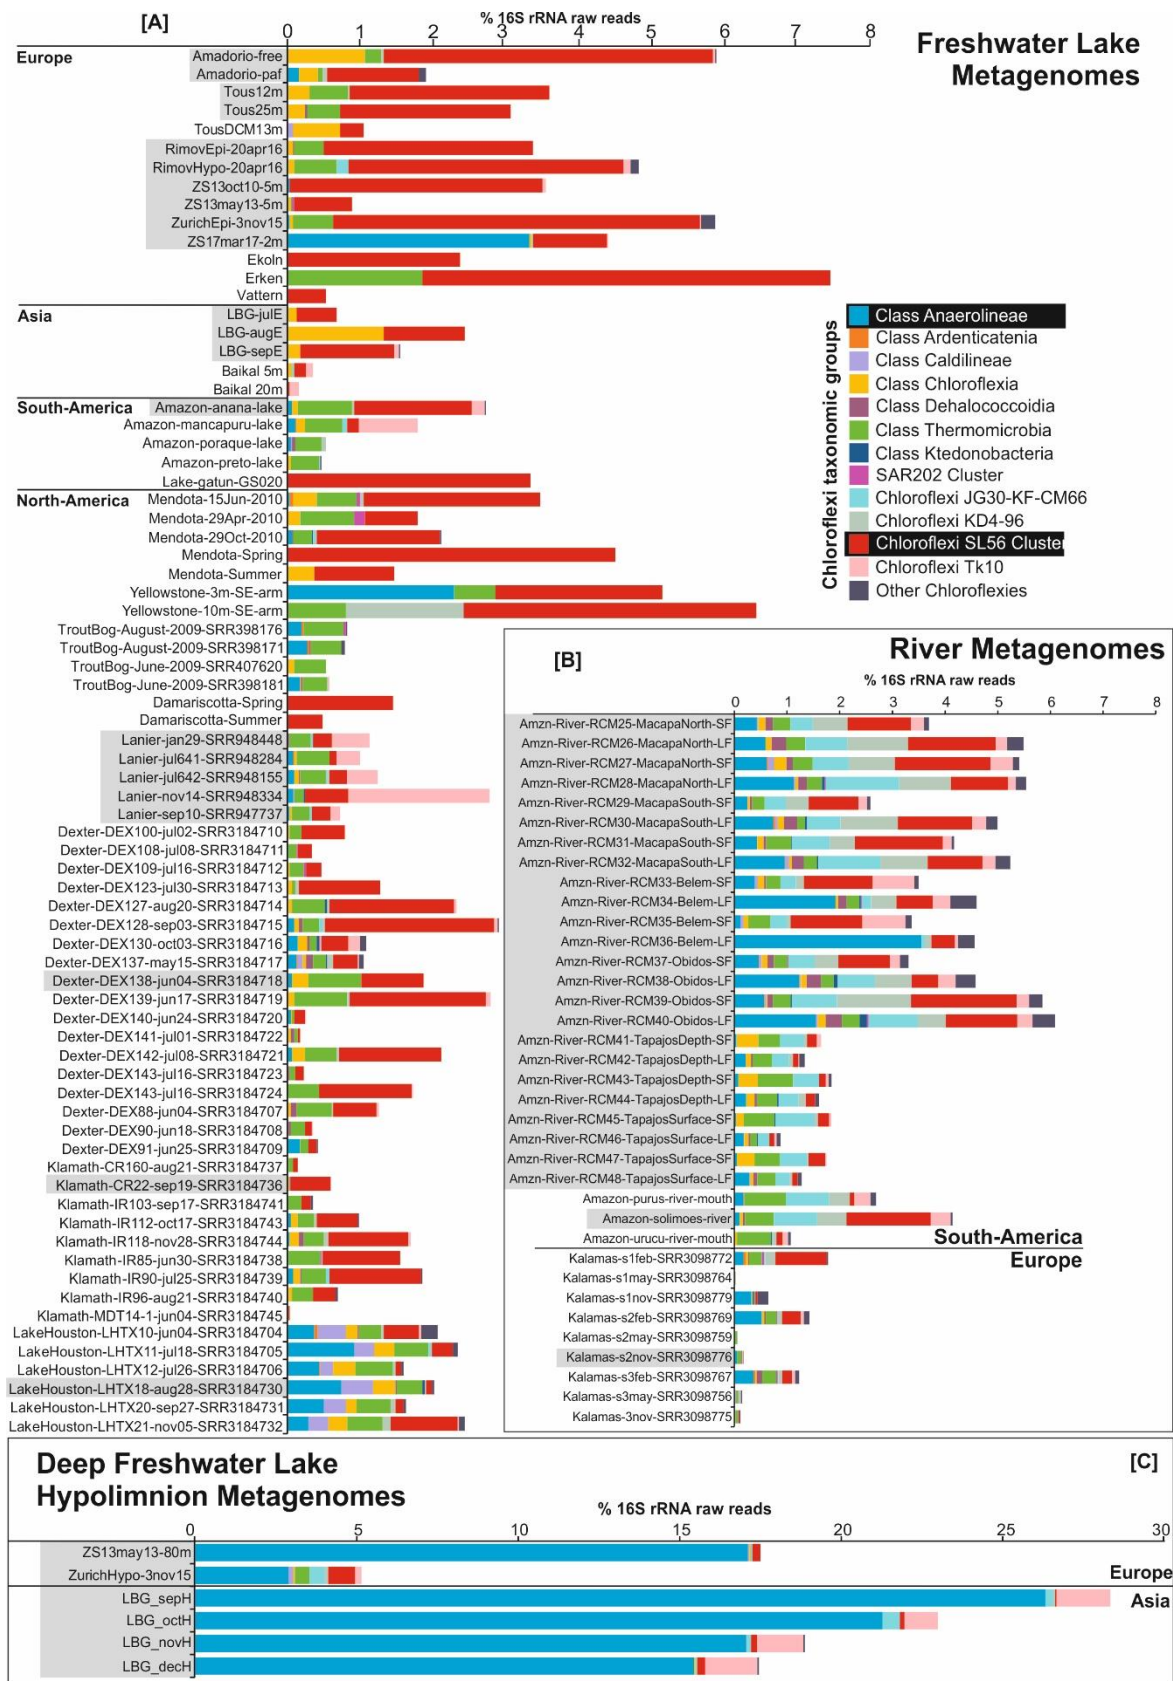

667

668 **Figure 1-** Distribution of *Chloroflexi* related 16S rRNA reads in unassembled metagenomic datasets

669 of freshwater environments. *Chloroflexi* related 16S rRNA reads were further assigned to lower

670 taxonomic levels based on the best BLAST to class-level taxa. Values are shown as a percentage of  
671 total prokaryotic community in [A] freshwater lakes, [B] rivers, and [C] deep lake hypolimnion.  
672 Datasets highlighted in gray were used for assembly. The complete list of datasets used and their  
673 metadata is available in Supplementary Table S3.  
674



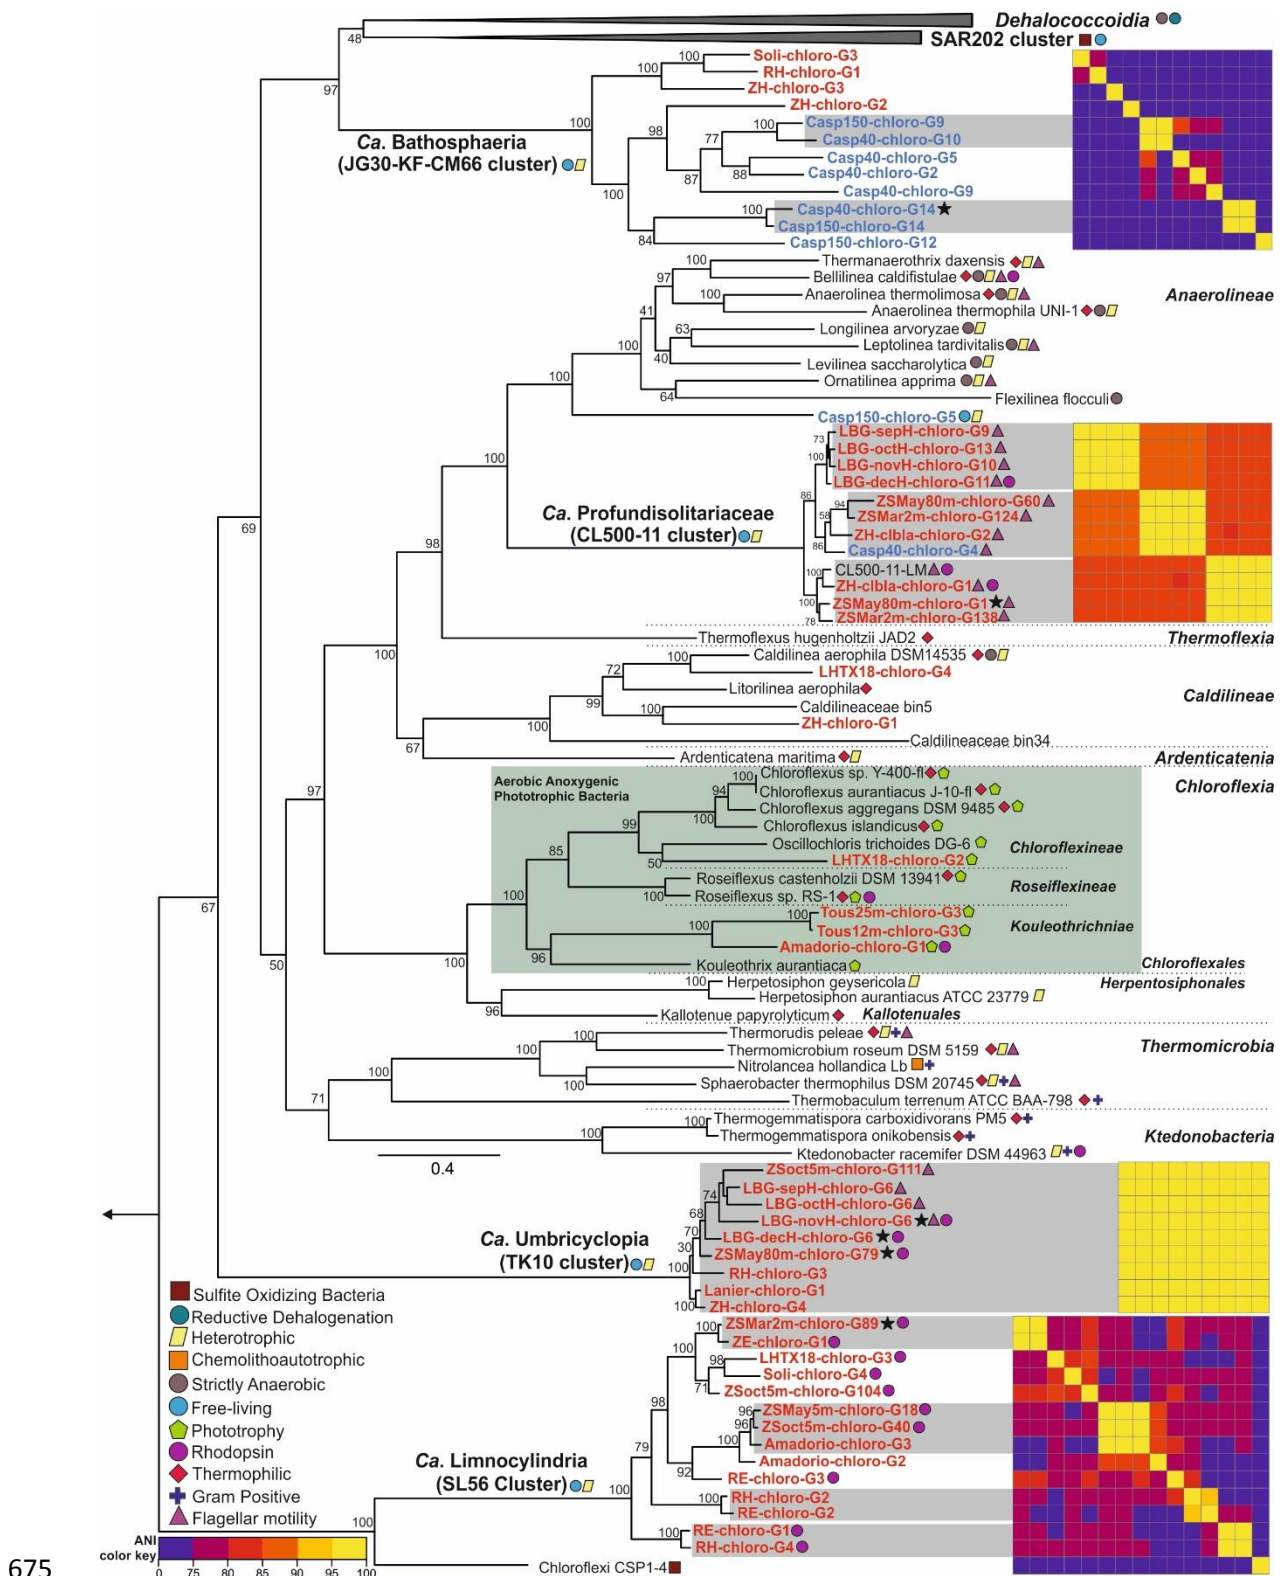

680 in tree of life in PhyloPhIAn. An asterisk next to a MAG shows the presence of 16S rRNA. Bootstrap  
681 values (%) are indicated at the base of each node. Legends for lifestyle hints are on bottom left.  
682 Average nucleotide identity comparison (ANI) heat map for MAGs of each cluster is shown to the  
683 right of each cluster. Reconstructed genomes belonging to the same species are shown inside a  
684 grey box. A color key for the ANI is shown at the bottom left. The green box shows the Aerobic  
685 anoxygenic phototrophic members of the class *Chloroflexia*.  
686



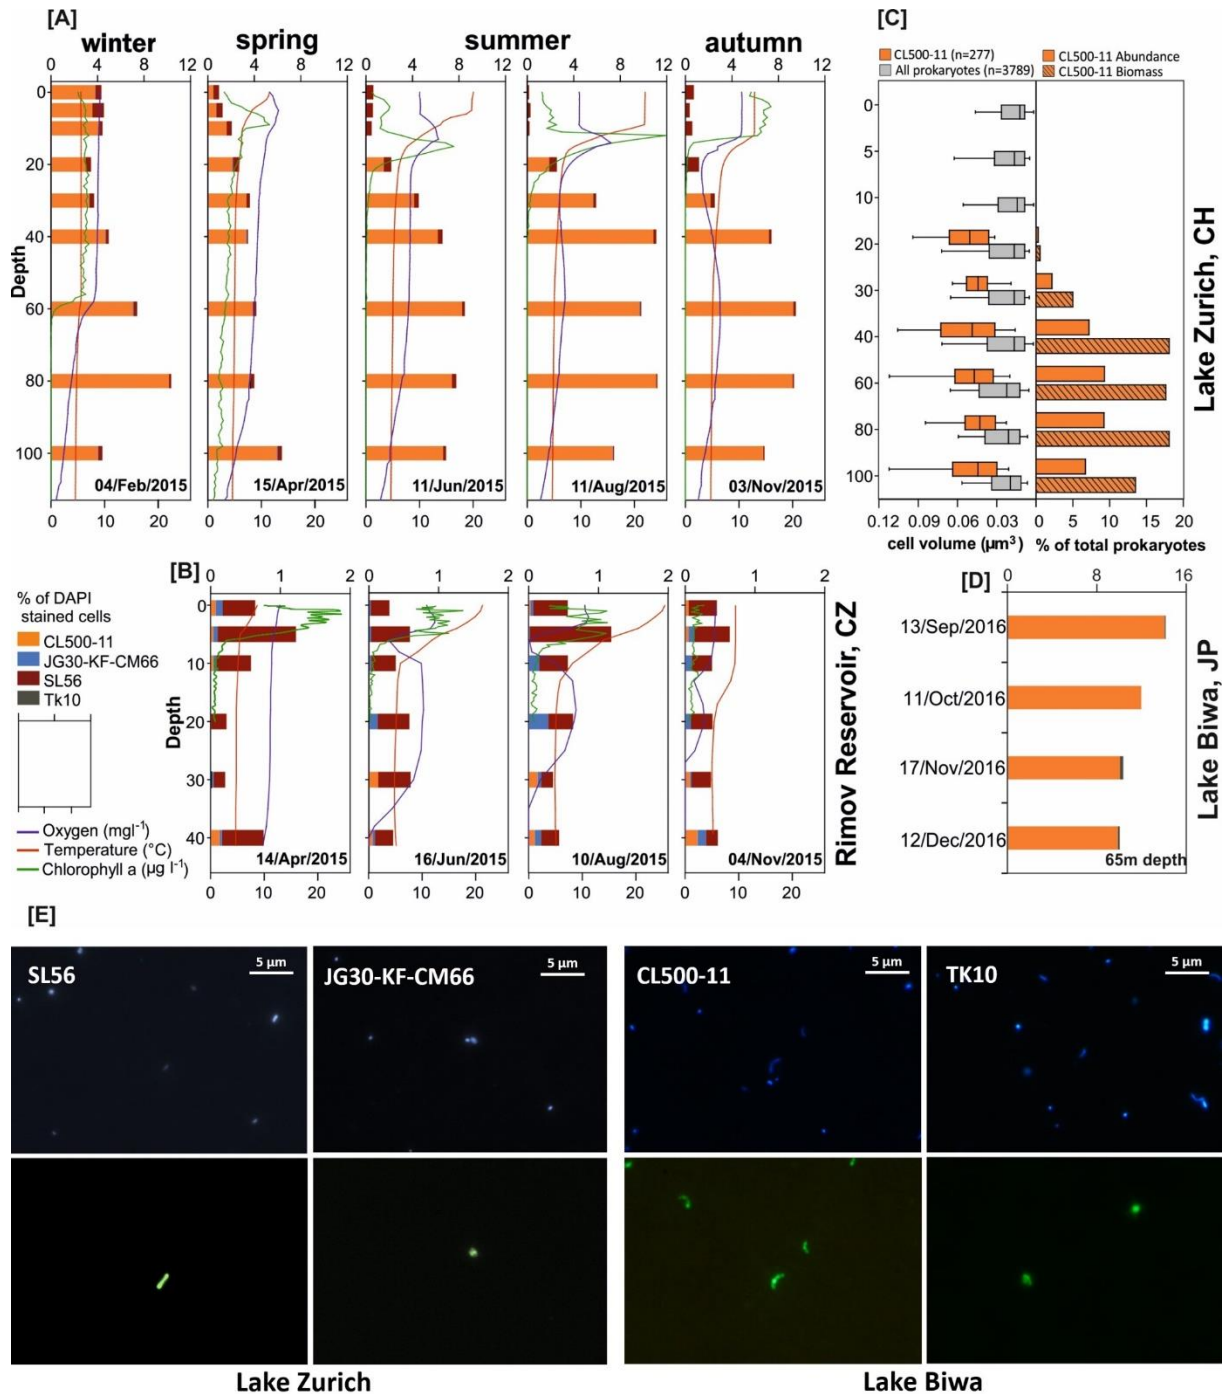

687

688 **Figure 3-** Spatiotemporal distribution and cell shape of different *Chloroflexi* lineages based on  
 689 CARD-FISH analysis. Seasonal dynamic and vertical stratification of different *Chloroflexi* lineages  
 690 according to CARD-FISH analysis in [A] Lake Zurich at five sampling times and [B] Rimov reservoir  
 691 at four sampling times during the year 2015. The stacked bars show the percentage of DAPI stained  
 692 cells (top axis) and the smooth lines show vertical profiles of water temperature, oxygen and  
 693 chlorophyll a (bottom axis). [C] Cell volume ( $\mu\text{m}^3$ ) of CARD-FISH stained *Chloroflexi* CL500-11

694 (n=277) and all prokaryotes (n=3789) along depth profile of the Lake Zurich on November 3rd  
695 2015. Boxes show 5th and 95th percentile and the vertical line represents the median. The  
696 percentage of CL500-11 abundance and biomass among prokaryotes of the same depth profile is  
697 shown on the right side. [D] The abundance of Chloroflexi lineages in 65m depth of the Lake Biwa  
698 at four sampling times in 2016. [E] CARD-FISH images of different *Chloroflexi* lineages. An identical  
699 microscopic field is shown for each column, with the DAPI-stained cells in the top and bacteria  
700 stained by cluster specific CARD-FISH probes of each cluster on the bottom. The scale is shown on  
701 the top right side of the DAPI stained cells field.  
702



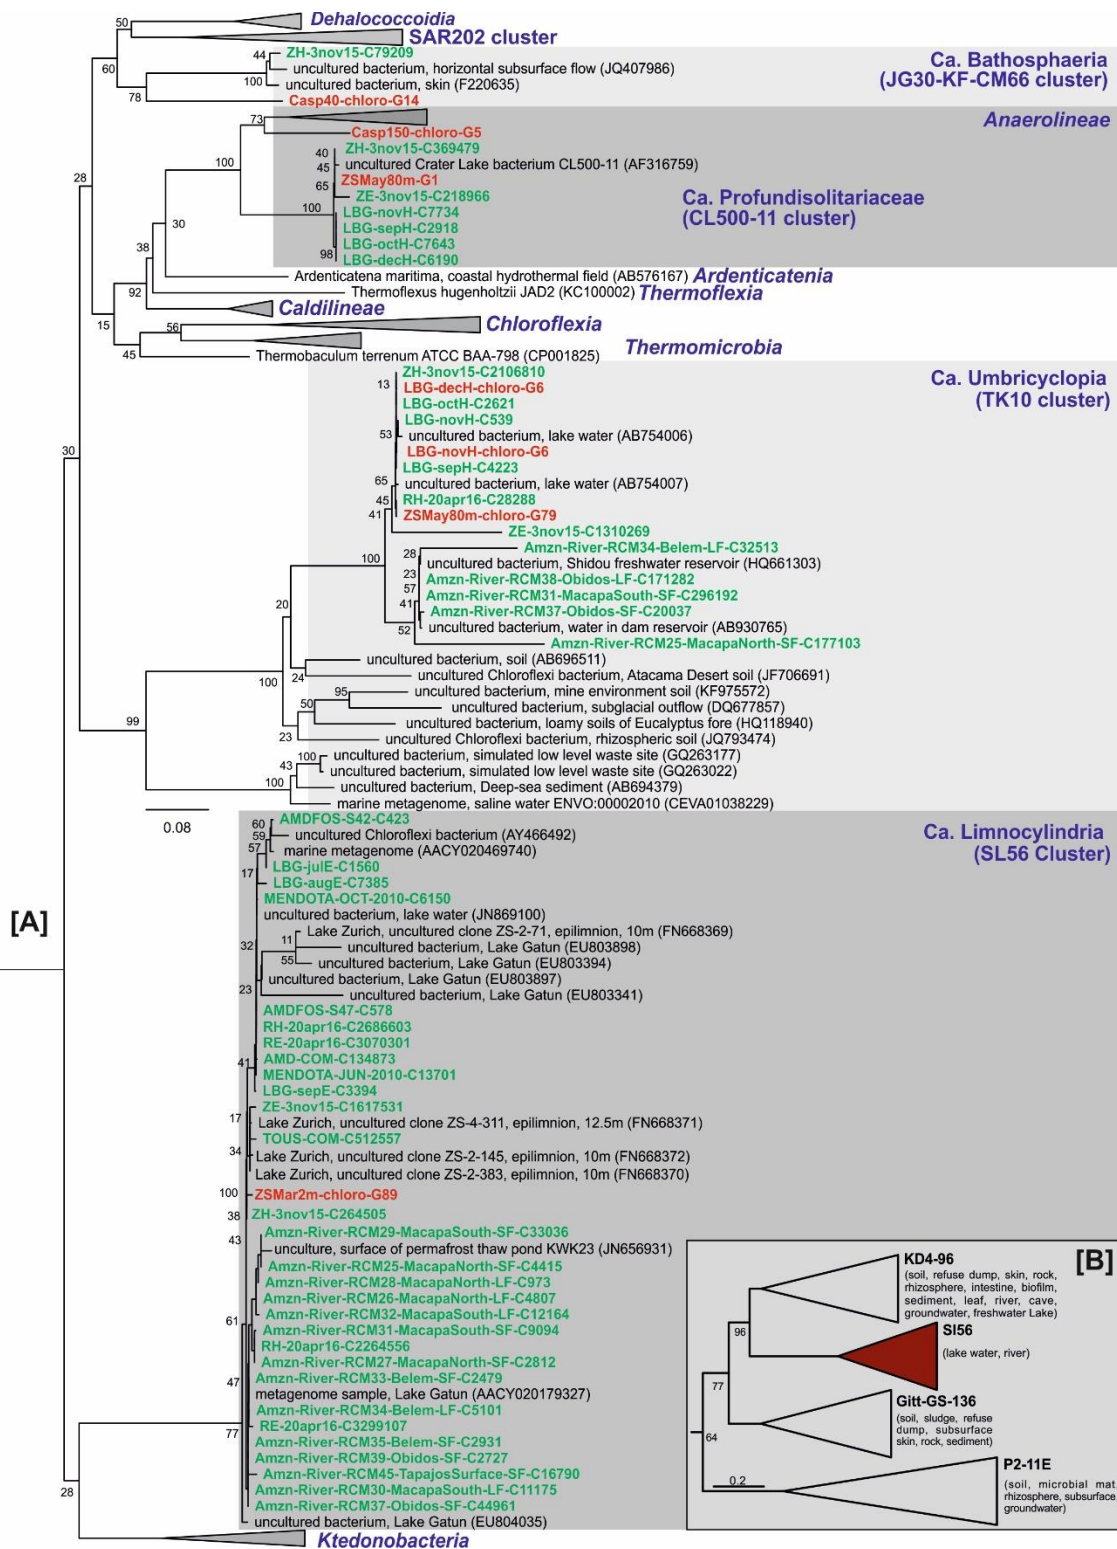

715  
716

717 **Supplementary Figure S1-** Maximum likelihood 16S rRNA tree reconstructed by adding the 16S rRNA  
718 sequences assembled from freshwater metagenomes to existing sequences of the SSUref\_NR99\_128  
719 database in the phylum *Chloroflexi*. Bootstrap values (%) are indicated at the base of each node. 16S  
720 rRNA sequences present in a MAG are highlighted in red and the other metagenomic assembled 16S  
721 rRNA sequences are highlighted in green [A]. Maximum likelihood 16S rRNA tree of the SL56 cluster  
722 together with its closely related clusters. The origin of the 16S rRNA sequences present in SILVA for  
723 each cluster are summarized in parenthesis [B].



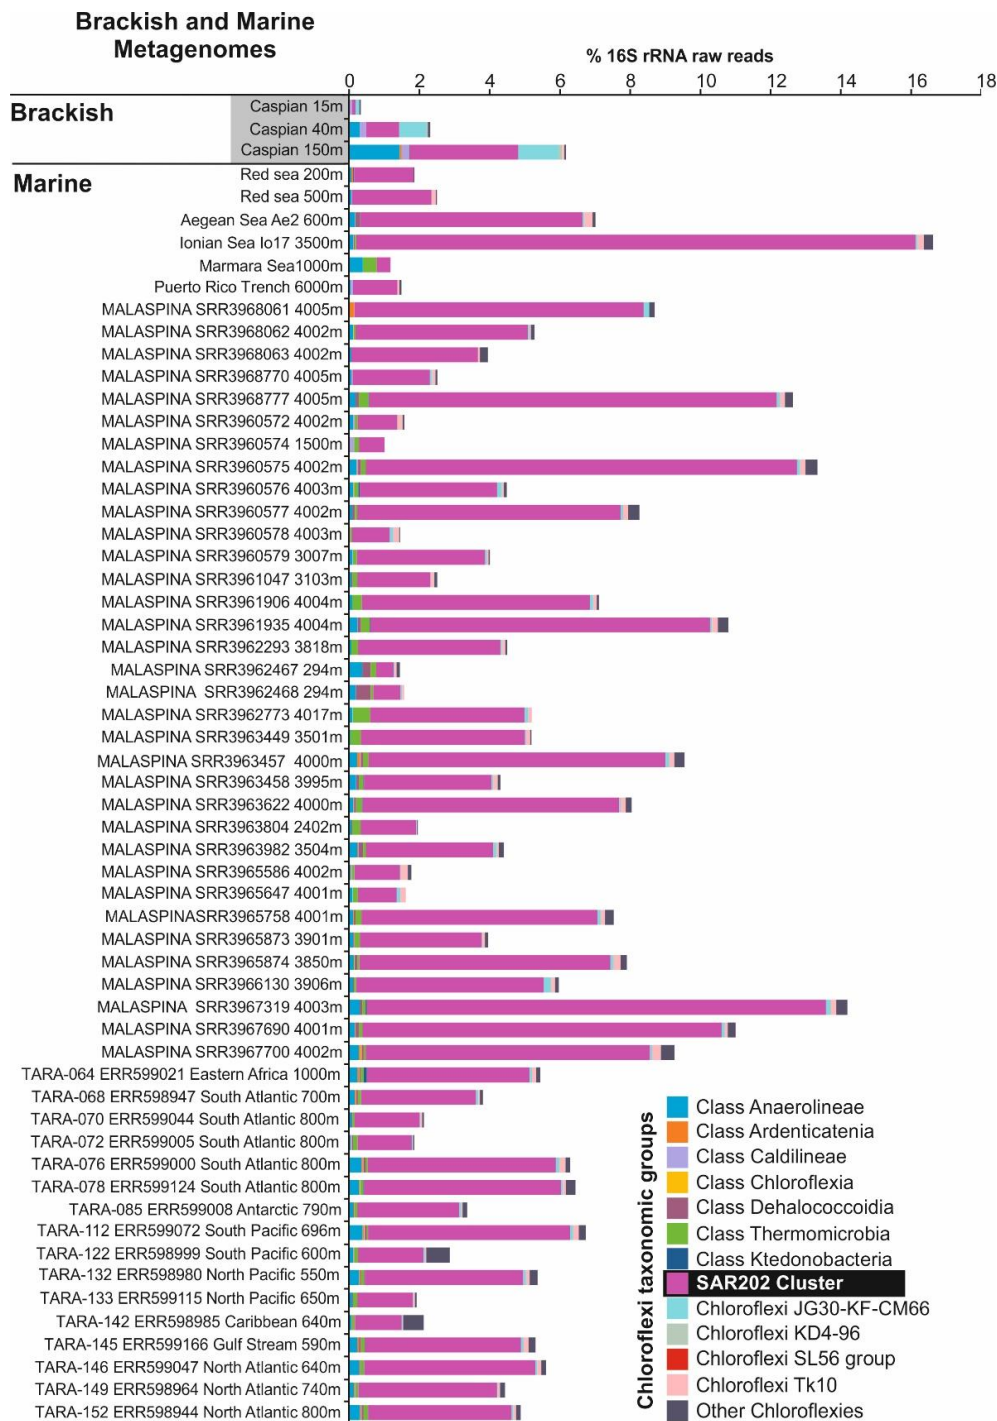

724  
725

726 **Supplementary Figure S2-** Percentage and distribution of *Chloroflexi* related 16S rRNA reads (as % of  
727 total prokaryotic community) based on unassembled metagenomic datasets in brackish and marine  
728 datasets. Brackish datasets include three different depths of the Caspian Sea. Marine datasets include  
729 Aegean Sea (one DCM and one deep dataset), Ionian Sea (one DCM and one deep dataset), Atlantic  
730 BATS, Pacific HOTS and Red Sea depth profile datasets together with selected deep datasets from  
731 MALASPINA and TARA expeditions and the Puerto Rico deep trench dataset. Chloroflexi related reads  
732 were further assigned to lower taxonomic levels of the phylum Chloroflexi based on the best BLAST hit  
733 to class-level taxa. The complete list of datasets used is available in (Mehrshad *et al.*, 2017). Datasets  
734 highlighted in gray were used for the assembly.

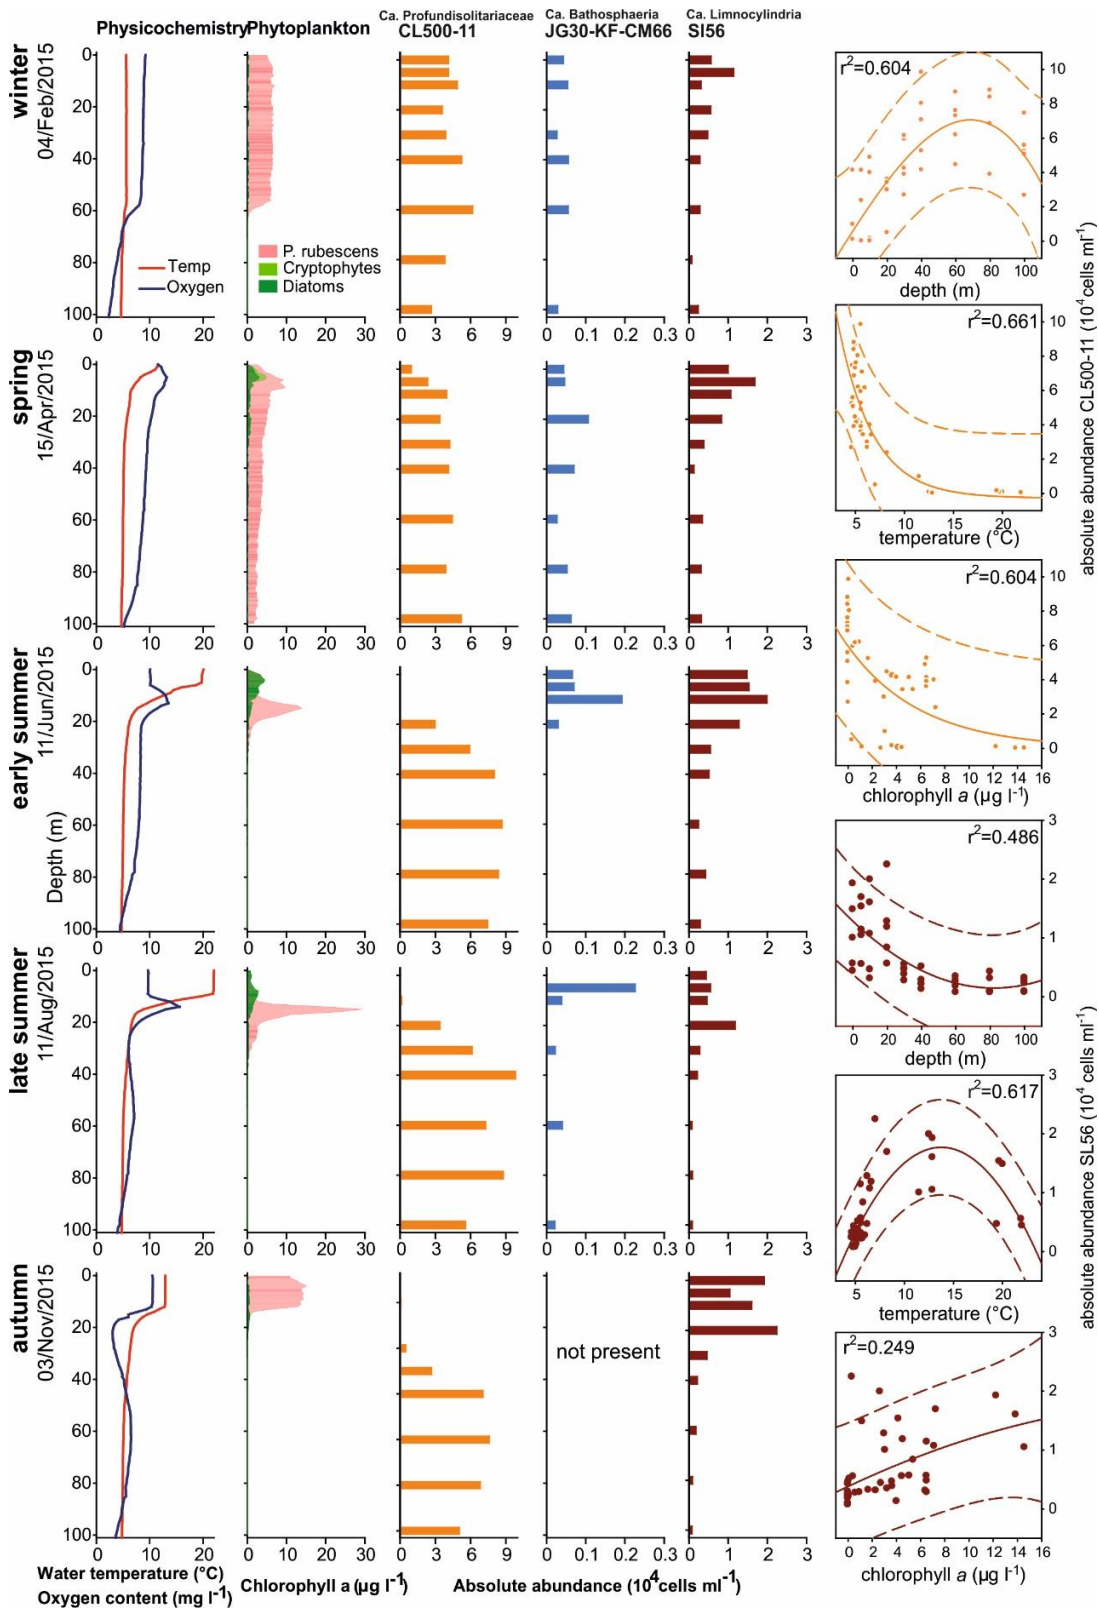

735

736 **Supplementary Figure S3:** Vertical profiles of water temperature, oxygen, phytoplankton and absolute  
737 CARD-FISH abundances of three lineages of Chloroflexi in Lake Zurich at five different sampling point  
738 in 2015. Relationships of absolute abundances of the CL500-11 and SL56 groups to depth, temperature  
739 and chlorophyll *a* are shown at the right. Correlation coefficients ( $r^2$ ) are indicated within the plots.

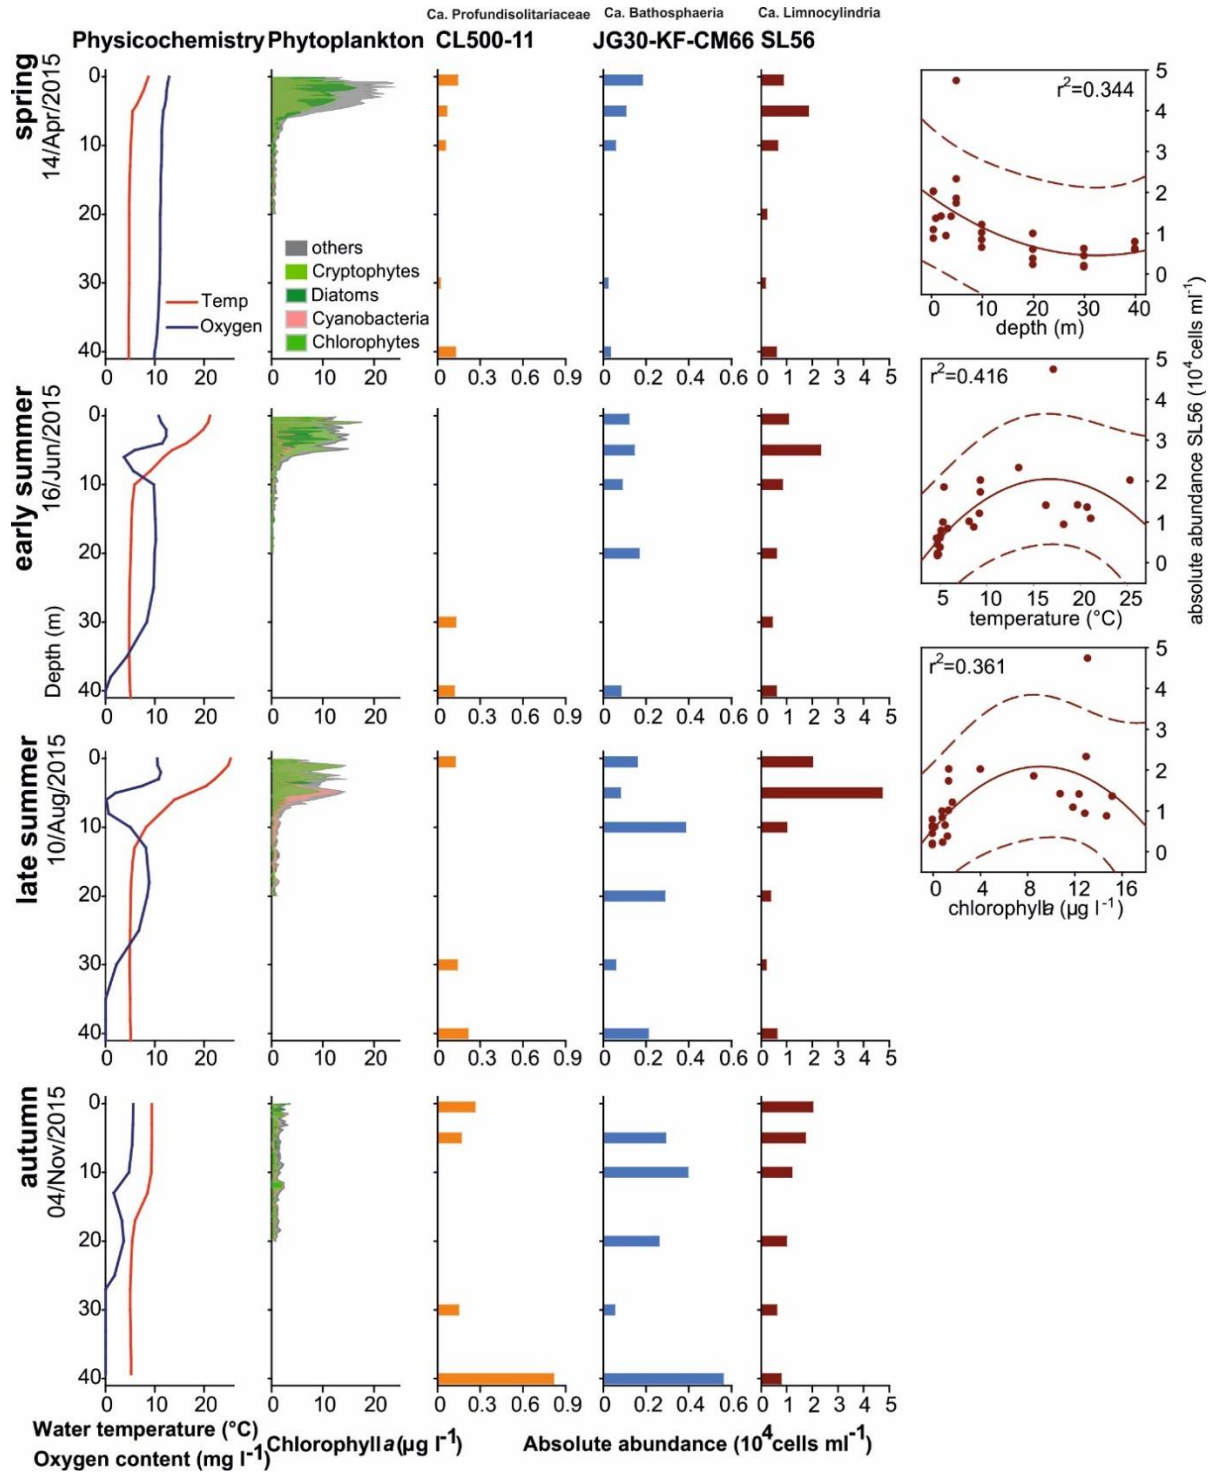

740

741

742 **Supplementary Figure S4:** Vertical profiles of water temperature, oxygen, phytoplankton and absolute  
 743 CARD-FISH abundances of three lineages of Chloroflexi in Rimov Reservoir at four different sampling  
 744 points in 2015. Relationships of absolute abundance of the SL56 group to depth, temperature and  
 745 chlorophyll *a* are shown at the right. Correlation coefficients ( $r^2$ ) are indicated within the plots.



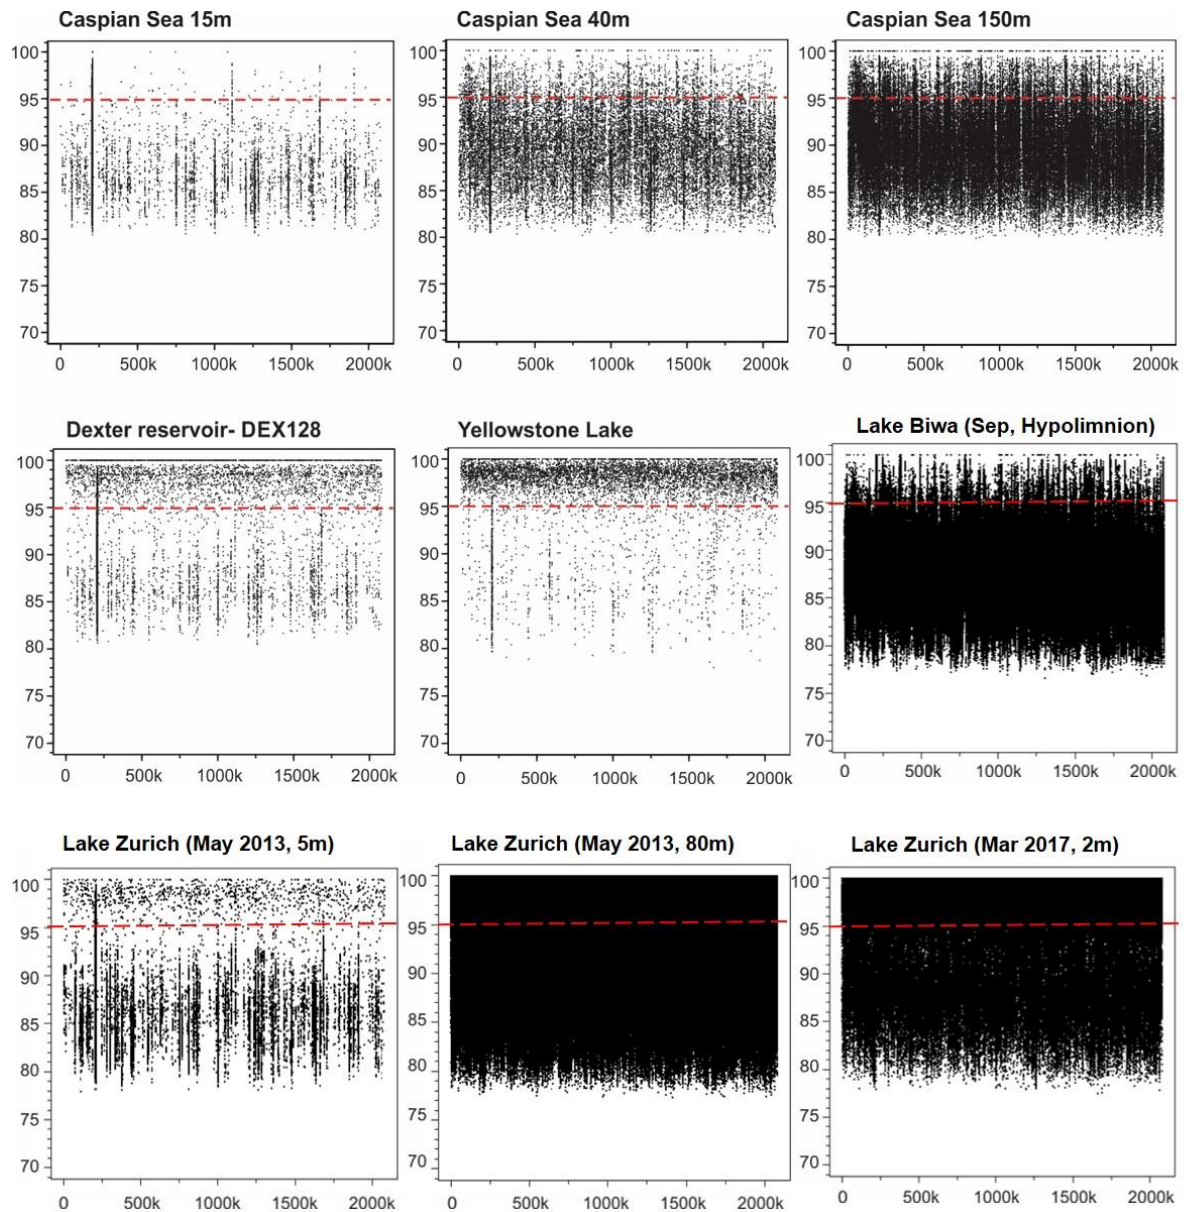

746

747 **Supplementary Figure S5:** Recruitment plot for ZSMay80m-G1 as a representative of the *Chloroflexi*  
748 CL500-11 cluster against different freshwater environments and the depth profile of brackish Caspian  
749 Sea. The ZSMay80m-G1 is the only bin that contains a 16S rRNA sequence and shows completeness  
750 of 75%. In each panel the Y axis represents the identity percentage and X axis represents the genome  
751 length. The red dashed line shows the threshold for presence of same species (95% identity).

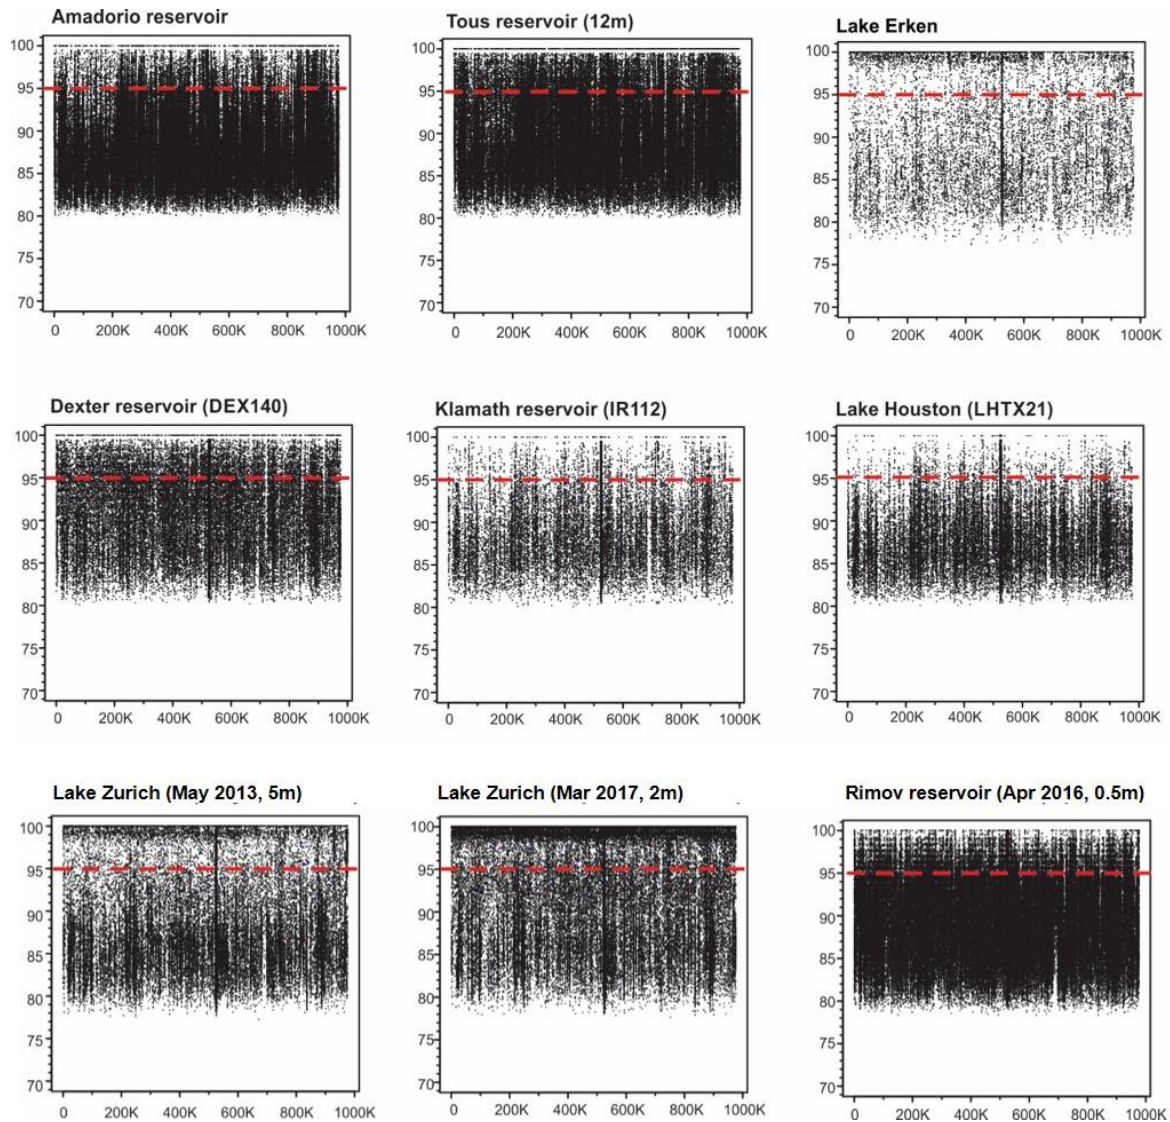

752

753 **Supplementary Figure S6:** Recruitment plot for ZSMar2m-G89 as a representative of the *Chloroflexi*  
754 SL56 cluster against different freshwater environments. The ZSMar2m-G89 is the only bin that contains  
755 a 16S rRNA sequence and shows completeness of 68%. In each panel the Y axis represents the identity  
756 percentage and X axis represents the genome length. The red dashed line shows the threshold for  
757 presence of same species (95% identity).



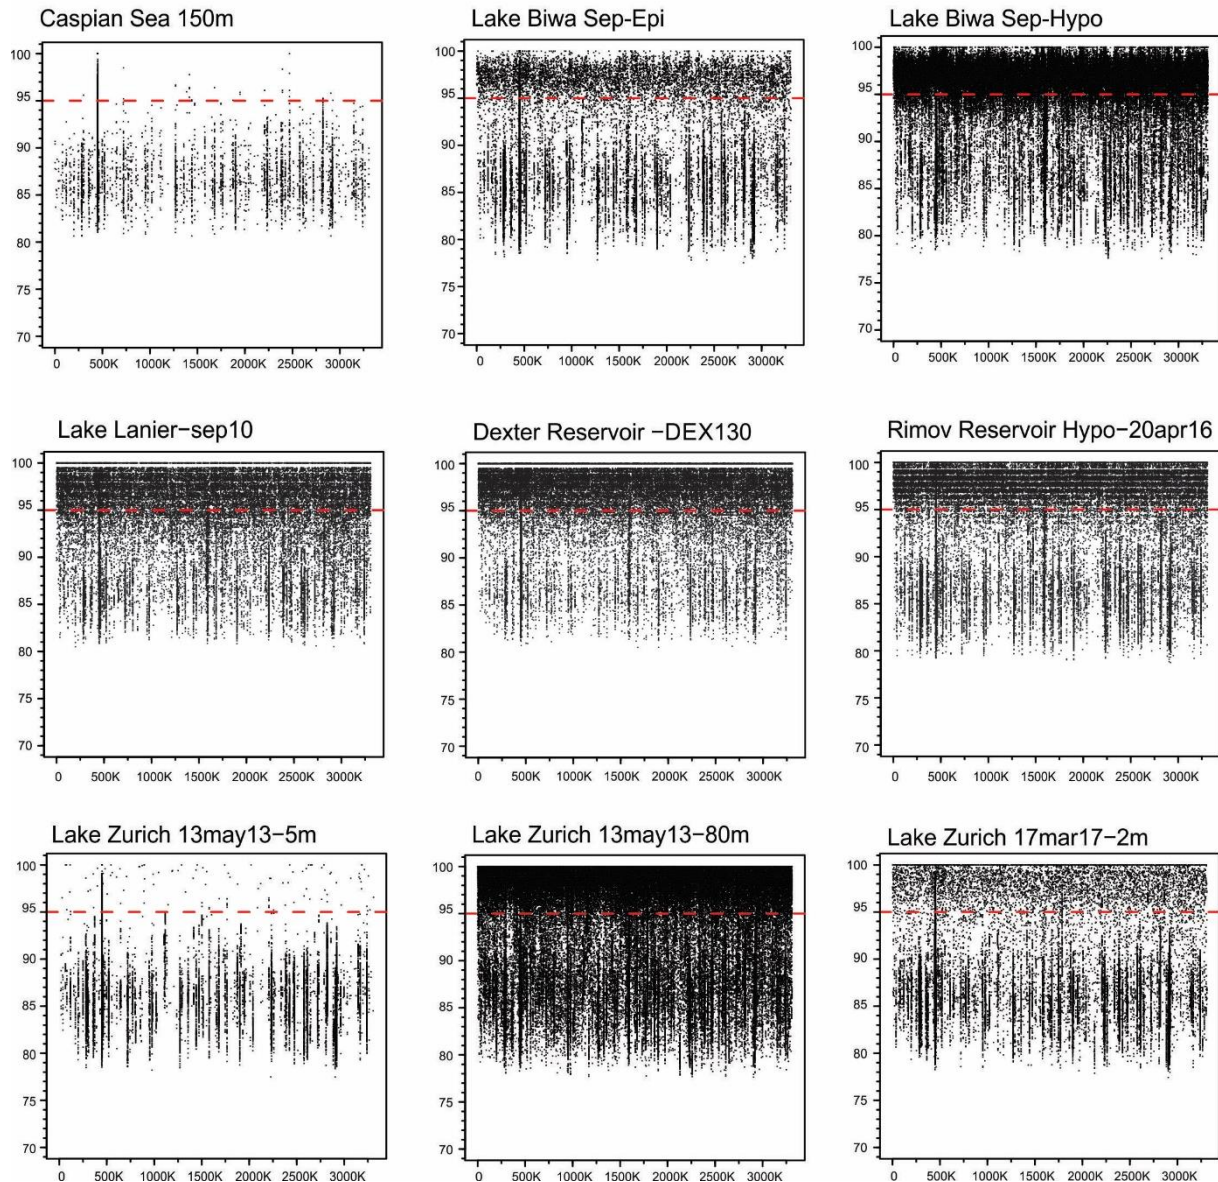

758

759

760 **Supplementary Figure S7:** Recruitment plot for ZSMay80m-G79 as a representative of the Chloroflexi  
761 TK10 cluster against deep Caspian Sea dataset and different freshwater environments. The ZSMay80m-  
762 G79 is the most complete genome in the TK10 cluster (85%) and also contains a 16S rRNA sequence.  
763 In each panel the Y axis represents the identity percentage and X axis represents the genome length.  
764 The red dashed line shows the threshold for presence of same species (95% identity).

765

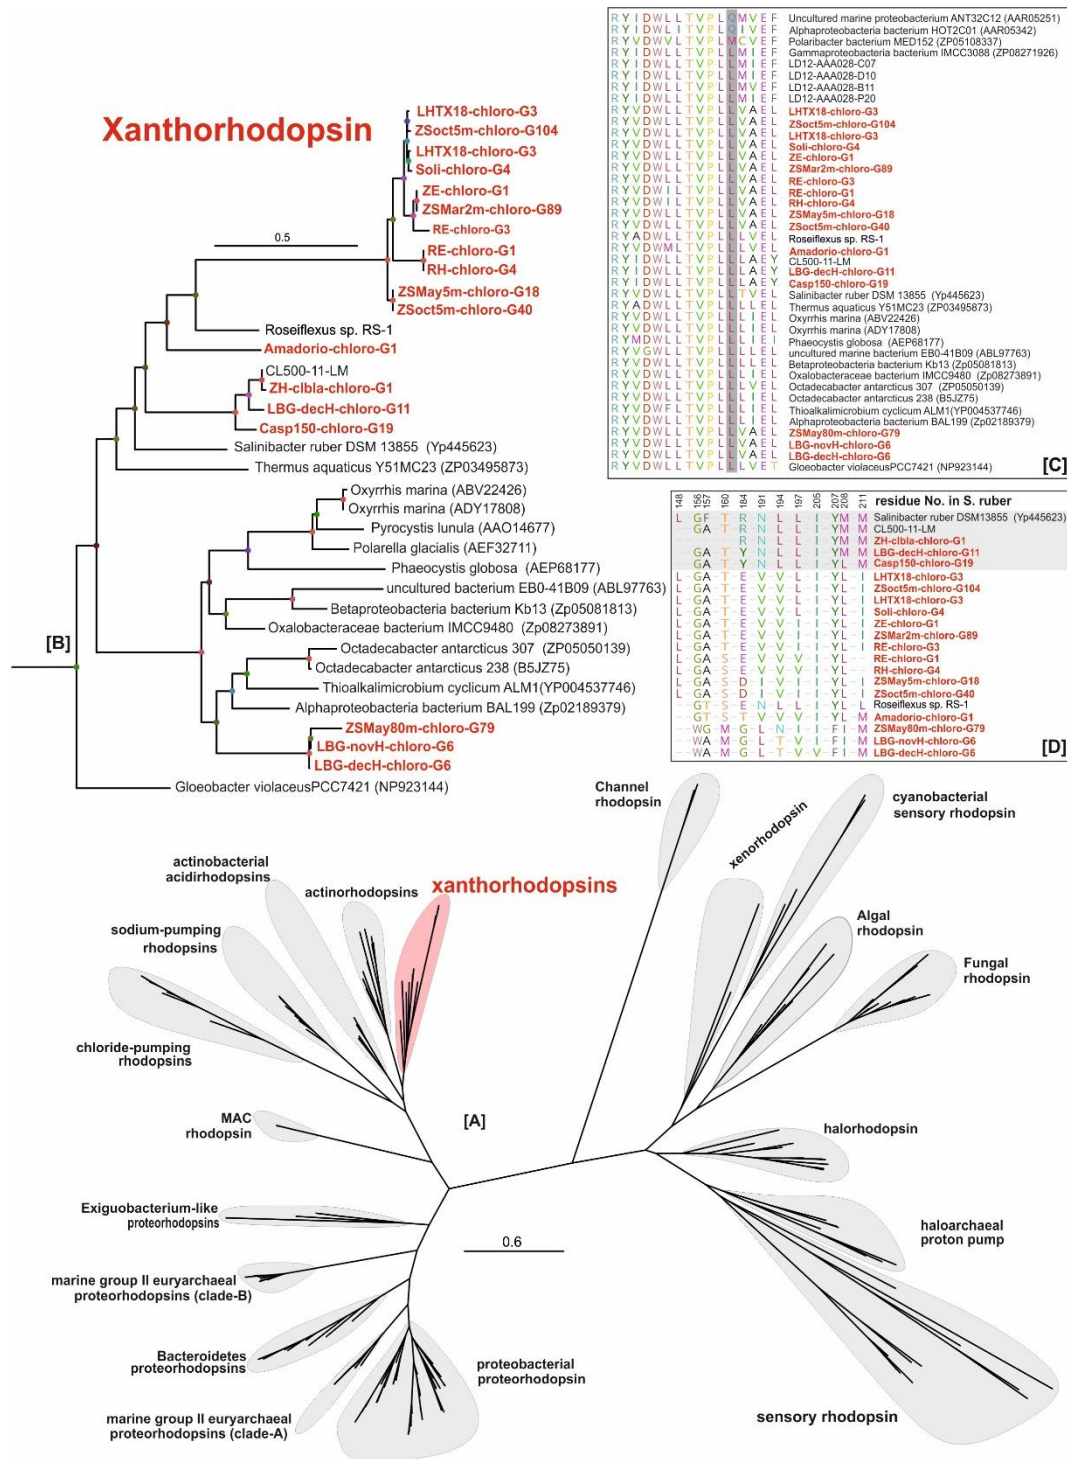

766

767 **Supplementary Figure S8-** Maximum likelihood tree of rhodopsin protein sequences from different  
 768 bacterial and archaeal groups (212 protein sequences in total) [A]. Expanded Maximum likelihood tree  
 769 of the rhodopsin protein sequences belonging to the phylum *Chloroflexi* [B]. The alignment of the  
 770 rhodopsin protein sequences from the amino acid associated with light absorption preferences. The  
 771 leucine (L) and methionine (M) variants absorb maximally in the green spectrum while the glutamine  
 772 (Q) variant absorbs maximally in the blue spectrum [C]. The alignment of amino acid residues involved  
 773 in carotenoid binding in *Salinibacter ruber* DSM13855 (Luecke *et al.*, 2008) and Xanthorhodopsin like  
 774 sequences of the phylum *Chloroflexi*. The residue number is mentioned on top of the panel [D]. The  
 775 rhodopsin genes present in the MAGs of this study are highlighted in red.

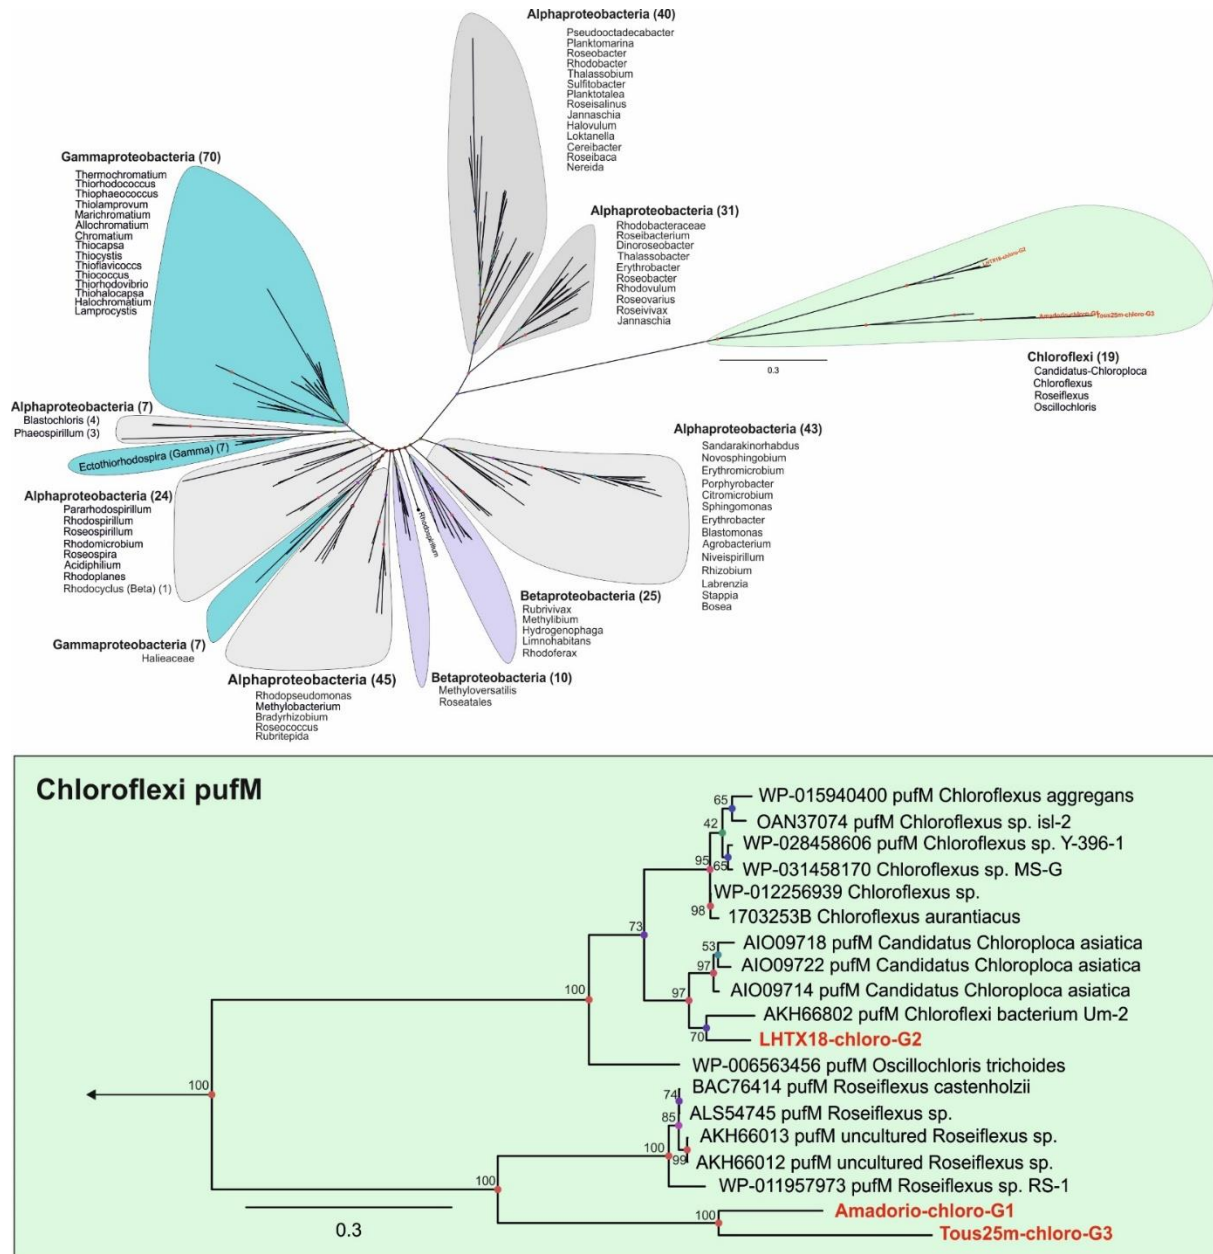

776

777 **Supplementary Figure S9-** Maximum likelihood tree of the *pufM* protein sequences from different  
 778 bacterial groups (328 protein sequences in total) [A]. Expanded Maximum likelihood tree of the *pufM*  
 779 protein sequences belonging to the phylum *Chloroflexi* [B]. The *pufM* genes present in the MAGs of  
 780 this study are highlighted in red.

781
